# Supplementary material for: Assessment of the control measures of the Category A diseases of the Animal Health Law: prohibitions in restricted zones and risk‐mitigating treatments for products of animal origin and other materials
Source: PubMed Central journal article supplement (PMC9361132; doi:10.2903/j.efsa.2022.7443), 2022-08-09
Supplement: EFS2-20-e07443-s001.pdf [file EFS2-20-e07443-s001.pdf]

Annex to:

EFSA AHAW Panel (EFSA Panel on Animal Health and Welfare), Nielsen SS, Alvarez J, Bicout DJ, Calistri P, Canali E, Drewe JA, Garin-Bastuji B, Gonzales Rojas JL, Gortázar Schmidt C, Herskin M, Michel V, Miranda Chueca MA, Padalino B, Pasquali P, Stahl K, Velarde Calvo A, Viltrop A, Winckler C, De Clercq K, Sjunnesson Y, Gervelmeyer A and Roberts HC, 2022. Assessment of the control measures of the category A diseases of the Animal Health Law: Prohibitions in restricted zones and risk-mitigating treatments for products of animal origin and other materials. EFSA Journal 2022;20(8):7443, doi: 10.2903/j.efsa.2022.7443

© 2022 Wiley-VCH Verlag GmbH & Co. KGaA on behalf of the European Food Safety Authority.

## **Annex B – Extensive literature search on the presence of selected Category A disease pathogens in animal products, animal by-products and feed of plant origin and straw**

CoVetLab consortium (Swedish National Veterinary Institute (SVA), Sweden; Wageningen Bioveterinary Research (WBVR), The Netherlands; Animal and Plant Health Agency (APHA), UK)  
University of Surrey, UK)

## Table of Contents

|                                                                                                                                                                                |    |
|--------------------------------------------------------------------------------------------------------------------------------------------------------------------------------|----|
| Annex B – Extensive literature search on the presence of selected Category A disease pathogens in animal products, animal by-products and feed of plant origin and straw ..... | 1  |
| 1 Context .....                                                                                                                                                                | 3  |
| 2 Review question.....                                                                                                                                                         | 3  |
| 3 Results .....                                                                                                                                                                | 3  |
| 3.1 Disease-specific evidence extracted.....                                                                                                                                   | 3  |
| 3.1.1 Experimental infection studies.....                                                                                                                                      | 3  |
| Foot and Mouth Disease .....                                                                                                                                                   | 4  |
| Rinderpest .....                                                                                                                                                               | 7  |
| Lumpy Skin Disease.....                                                                                                                                                        | 7  |
| Contagious bovine pleuropneumonia .....                                                                                                                                        | 8  |
| Sheep pox and goat pox .....                                                                                                                                                   | 8  |
| Peste des petits ruminants .....                                                                                                                                               | 8  |
| Contagious caprine pleuropneumonia .....                                                                                                                                       | 8  |
| Classical Swine Fever .....                                                                                                                                                    | 9  |
| African Swine Fever .....                                                                                                                                                      | 10 |
| African Horse Sickness.....                                                                                                                                                    | 12 |
| Highly Pathogenic Avian Influenza .....                                                                                                                                        | 12 |
| Newcastle Disease .....                                                                                                                                                        | 18 |
| 3.1.2 Surveillance studies.....                                                                                                                                                | 20 |
| Foot and Mouth Disease .....                                                                                                                                                   | 20 |
| Rinderpest .....                                                                                                                                                               | 24 |
| Lumpy Skin Disease.....                                                                                                                                                        | 25 |
| Contagious bovine pleuropneumonia .....                                                                                                                                        | 25 |
| Sheep pox and goat pox .....                                                                                                                                                   | 25 |
| Peste des petits ruminants .....                                                                                                                                               | 25 |
| Contagious caprine pleuropneumonia .....                                                                                                                                       | 26 |
| Classical Swine Fever .....                                                                                                                                                    | 26 |
| African Swine Fever .....                                                                                                                                                      | 28 |
| African Horse Sickness.....                                                                                                                                                    | 34 |
| Highly Pathogenic Avian Influenza .....                                                                                                                                        | 34 |
| Newcastle Disease .....                                                                                                                                                        | 38 |
| 4 References .....                                                                                                                                                             | 41 |
| Appendix A – Extensive literature search protocol .....                                                                                                                        | 47 |

## 1 Context

The EFSA has been requested to provide scientific opinions to support the European Commission (EC) in the production of amending and implementing acts related to Regulation 2016/429 (the 'Animal Health Law' (AHL)) which lays down rules for the prevention and control of diseases included in the list of Category A diseases. The Commission has developed and adopted a Delegated Regulation ("the Delegated Regulation") supplementing the rules laid down in AHL. Certain disease control measures proposed in the Annexes of the Delegated Regulation are considered as outdated and need to be updated by reviewing the current scientific literature.

As part of this, and in order to answer ToR 4.1 to assess the effectiveness of the control measures related to animal products, animal by-products and feed of plant origin and straw set out in Annex VI to the Delegated Regulation, the EFSA has asked COVETLAB to carry out an extensive literature search (ELS).

## 2 Review question

As described in the final protocol (**Appendix A**), the aim of the ELS was to answer the question whether *animal products, animal by-products and feed of plant origin and straw* (i.e., "matrices") collected from affected animals of listed species in affected establishments pose a risk to transmit the following diseases:

- Foot and Mouth Disease (FMD)
- Infection with Rinderpest virus (RP)
- Infection with Rift Valley Fever virus (RVF)
- Infection with Lumpy Skin Disease virus (LSD)
- Infection with *Mycoplasma mycoides* subsp. *mycoides* (Contagious Bovine Pleuropneumonia) (CBPP)
- Sheep Pox and Goat Pox (SPGP)
- Infection with Peste des Petits Ruminants virus (PPR)
- Contagious Caprine Pleuropneumonia (CCPP)
- Classical Swine Fever (CSF)
- African Swine Fever (ASF)
- African Horse Sickness (AHS)
- Highly Pathogenic Avian Influenza (HPAI)
- Newcastle Disease (ND)

## 3 Results

### 3.1 Disease-specific evidence extracted

#### 3.1.1 Experimental infection studies

The evidence identified in the ELS is presented in a table showing all matrices in which viable disease agent was identified by virus isolation, inoculation experiment or culture following an experimental infection of susceptible hosts and the number of animals sampled for the matrix in question. The results have been pooled across different strains or subtypes.

### Foot and Mouth Disease

| Host     | Matrix found positive | Number of animals sampled | refID <sup>(a)</sup>                                                                                                                                                                   |
|----------|-----------------------|---------------------------|----------------------------------------------------------------------------------------------------------------------------------------------------------------------------------------|
| Buffalos | Lesion Swab           | 6                         | 232375                                                                                                                                                                                 |
| Buffalos | Nasal Swab            | 6                         | 232375                                                                                                                                                                                 |
| Buffalos | Serum                 | 3                         | 232725                                                                                                                                                                                 |
| Camelus  | Serum                 | 5                         | 232318; 232361                                                                                                                                                                         |
| Cattle   | Blood                 | 139                       | 231909; 232034; 232073; 232192; 232211; 232289; 232324; 232427; 232466; 232480; 232499; 232501; 232510; 232599; 232609                                                                 |
| Cattle   | Coronary Band         | 18                        | 231835                                                                                                                                                                                 |
| Cattle   | Esophageal Swab       | 17                        | 232722                                                                                                                                                                                 |
| Cattle   | Faeces                | 22                        | 232034                                                                                                                                                                                 |
| Cattle   | Kidney                | 17                        | 232722                                                                                                                                                                                 |
| Cattle   | Lesion Swab           | 4                         | 232375                                                                                                                                                                                 |
| Cattle   | Lymph node            | 55                        | 231835; 231934; 232722                                                                                                                                                                 |
| Cattle   | Lung                  | 78                        | 231835; 231934; 232268; 232301; 232722                                                                                                                                                 |
| Cattle   | Milk                  | 24                        | 231851; 232466                                                                                                                                                                         |
| Cattle   | Nasal Swab            | 158                       | 231711; 231715; 231723; 231729; 231808; 231879; 231882; 231934; 231945; 231957; 232012; 232076; 232087; 232156; 232191; 232192; 232211; 232301; 232339; 232375; 232427; 232599; 232707 |
| Cattle   | Oroparhyngal Swab     | 68                        | 231646; 231729; 232034; 232191; 232289; 232589                                                                                                                                         |
| Cattle   | Saliva                | 47                        | 231723; 231808; 231934; 231945; 232191; 232298; 232488                                                                                                                                 |
| Cattle   | Serum                 | 94                        | 231646; 231711; 231715; 231723; 231808; 231934; 231945; 231957; 232012; 232087; 232123; 232190; 232298; 232301; 232488                                                                 |
| Cattle   | Thyroid               | 16                        | 232268                                                                                                                                                                                 |
| Cattle   | Tongue                | 106                       | 231835; 231934; 232002; 232012; 232268; 232707; 232722                                                                                                                                 |
| Cattle   | Tonsil                | 56                        | 231835; 231909; 231934; 232268                                                                                                                                                         |
| Cattle   | Trachea               | 36                        | 231934; 232268                                                                                                                                                                         |

| Host          | Matrix found positive | Number of animals sampled | refID <sup>(a)</sup>                                                                                                                                                                           |
|---------------|-----------------------|---------------------------|------------------------------------------------------------------------------------------------------------------------------------------------------------------------------------------------|
| Cattle        | Urine                 | 32                        | 232034; 232073                                                                                                                                                                                 |
| Deers         | Blood                 | 14                        | 231724; 232178                                                                                                                                                                                 |
| Deers         | Liver                 | 4                         | 232178                                                                                                                                                                                         |
| Deers         | Lung                  | 4                         | 232178                                                                                                                                                                                         |
| Deers         | Nasal Swab            | 20                        | 231724; 231943                                                                                                                                                                                 |
| Deers         | Serum                 | 14                        | 231943; 232178                                                                                                                                                                                 |
| Deers         | Spleen                | 4                         | 232178                                                                                                                                                                                         |
| Deers         | Thyroid               | 4                         | 232178                                                                                                                                                                                         |
| Deers         | Tongue                | 4                         | 232178                                                                                                                                                                                         |
| Deers         | Tonsil                | 4                         | 232178                                                                                                                                                                                         |
| Domestic pigs | Blood                 | 215                       | 232004; 232046; 232090; 232291; 232295; 232297; 232326; 232336; 232359; 232362; 232390; 232437; 232479; 232495; 232559; 232580; 232609; 232617; 232660; 232713                                 |
| Domestic pigs | Bone Marrow           | 24                        | 232326                                                                                                                                                                                         |
| Domestic pigs | Coronary Band         | 19                        | 232101                                                                                                                                                                                         |
| Domestic pigs | Esophageal Swab       | 6                         | 231876                                                                                                                                                                                         |
| Domestic pigs | Faeces                | 27                        | 232048; 232326                                                                                                                                                                                 |
| Domestic pigs | Heart                 | 25                        | 231876; 232101                                                                                                                                                                                 |
| Domestic pigs | Kidney                | 39                        | 232101; 232326                                                                                                                                                                                 |
| Domestic pigs | Lymph node            | 19                        | 232101                                                                                                                                                                                         |
| Domestic pigs | Liver                 | 51                        | 232101; 232326; 232615                                                                                                                                                                         |
| Domestic pigs | Lung                  | 49                        | 231876; 232101; 232326                                                                                                                                                                         |
| Domestic pigs | Muscle                | 43                        | 232101; 232326                                                                                                                                                                                 |
| Domestic pigs | Nasal Swab            | 244                       | 231646; 231723; 231876; 231944; 231945; 231979; 232004; 232030; 232048; 232063; 232076; 232090; 232171; 232204; 232252; 232260; 232291; 232326; 232362; 232425; 232479; 232495; 232559; 232580 |
| Domestic pigs | Oroparhyngal Swab     | 92                        | 231646; 232046; 232228; 232281; 232341; 232465; 232483; 232537; 232589                                                                                                                         |

| Host          | Matrix found positive | Number of animals sampled | refID <sup>(a)</sup>                                                                                                                           |
|---------------|-----------------------|---------------------------|------------------------------------------------------------------------------------------------------------------------------------------------|
| Domestic pigs | Pancreas              | 43                        | 232101; 232326                                                                                                                                 |
| Domestic pigs | Peyer Patches         | 19                        | 232101                                                                                                                                         |
| Domestic pigs | Saliva                | 49                        | 231723; 231876; 231945; 231979; 232030; 232048; 232171; 232425                                                                                 |
| Domestic pigs | Serum                 | 132                       | 231646; 231723; 231876; 231944; 231945; 231979; 231998; 232048; 232063; 232171; 232204; 232252; 232287; 232320; 232481; 232575; 232593; 232615 |
| Domestic pigs | Skin                  | 19                        | 232101                                                                                                                                         |
| Domestic pigs | Spinal Cord           | 24                        | 232326                                                                                                                                         |
| Domestic pigs | Spleen                | 57                        | 231876; 232101; 232326; 232615                                                                                                                 |
| Domestic pigs | Stomach               | 6                         | 231876                                                                                                                                         |
| Domestic pigs | Testicles             | 24                        | 232326                                                                                                                                         |
| Domestic pigs | Thymus                | 6                         | 231876                                                                                                                                         |
| Domestic pigs | Tongue                | 49                        | 231876; 232101; 232326                                                                                                                         |
| Domestic pigs | Tonsil                | 51                        | 232101; 232326; 232615                                                                                                                         |
| Domestic pigs | Trachea               | 57                        | 231876; 232101; 232326; 232615                                                                                                                 |
| Domestic pigs | Vagina                | 24                        | 232326                                                                                                                                         |
| Goats         | Blood                 | 18                        | 231687; 232164; 232290; 232609                                                                                                                 |
| Goats         | Nasal Swab            | 26                        | 231723; 232087; 232164; 232290                                                                                                                 |
| Goats         | Saliva                | 12                        | 231723                                                                                                                                         |
| Goats         | Serum                 | 16                        | 231723; 232087                                                                                                                                 |
| Llama         | Blood                 | 30                        | 232705                                                                                                                                         |
| Sheep         | Blood                 | 268                       | 231687; 232033; 232040; 232073; 232164; 232290; 232382; 232454; 232539; 232559; 232586; 232599; 232600; 232638; 232659                         |
| Sheep         | Faeces                | 20                        | 232073                                                                                                                                         |
| Sheep         | Heart                 | 4                         | 231749                                                                                                                                         |
| Sheep         | Nasal Swab            | 54                        | 231841; 232164; 232290; 232382; 232559; 232599; 232659                                                                                         |
| Sheep         | Oroparhyngal Swab     | 68                        | 232033; 232040; 232454; 232589                                                                                                                 |
| Sheep         | Cloacal Swab          | 10                        | 232599                                                                                                                                         |
| Sheep         | Saliva                | 14                        | 232382; 232659                                                                                                                                 |
| Sheep         | Serum                 | 20                        | 231749; 231841; 232361                                                                                                                         |

| Host      | Matrix found positive | Number of animals sampled | refID <sup>(a)</sup> |
|-----------|-----------------------|---------------------------|----------------------|
| Sheep     | Tongue                | 8                         | 231749               |
| Wild boar | Nasal Swab            | 2                         | 232171               |
| Wild boar | Oroparhyngal Swab     | 13                        | 232228               |
| Wild boar | Serum                 | 4                         | 232171               |

(a): The complete reference information is available at: <https://animal-diseases.efsa.europa.eu/FMDV/#page-4>.

## Rinderpest

| Host   | Matrix found positive | Number of animals sampled | refID <sup>(a)</sup>                   |
|--------|-----------------------|---------------------------|----------------------------------------|
| Cattle | Blood                 | 13                        | 230251; 230319; 230361; 230402; 232747 |
| Cattle | Eye Swab              | 20                        | 230183; 230251; 230288; 230402; 232269 |
| Cattle | Heart                 | 2                         | 230288                                 |
| Cattle | Kidney                | 2                         | 230288                                 |
| Cattle | Lymph node            | 20                        | 230183; 230288; 230353; 230406; 232269 |
| Cattle | Lung                  | 2                         | 230288                                 |
| Cattle | Nasal Swab            | 18                        | 230183; 230288; 230402; 232269         |
| Cattle | Oropharyngeal Swab    | 6                         | 230183                                 |
| Cattle | Peyer Patches         | 12                        | 230183; 232269                         |
| Cattle | Cloacal Swab          | 12                        | 230183; 232269                         |
| Cattle | Spleen                | 17                        | 230183; 230288; 230406; 232269         |
| Cattle | Tongue                | 3                         | 230353                                 |
| Cattle | Tonsil                | 8                         | 230183; 230288                         |
| Cattle | Vagina                | 6                         | 230183                                 |

(a): The complete reference information is available at: <https://animal-diseases.efsa.europa.eu/RPV/#page-4>.

## Lumpy Skin Disease

| Host   | Matrix found positive | Number of animals sampled | refID <sup>(a)</sup>                           |
|--------|-----------------------|---------------------------|------------------------------------------------|
| Cattle | Blood                 | 43                        | 231714; 232066; 232288; 232369; 232457; 232516 |
| Cattle | Kidney                | 16                        | 210551; 232369                                 |
| Cattle | Lesion Swab           | 12                        | 231795                                         |
| Cattle | Lymph node            | 20                        | 210551; 231795                                 |
| Cattle | Lung                  | 12                        | 231795                                         |
| Cattle | Muscle                | 12                        | 231795                                         |
| Cattle | Nose Nasal Swab       | 24                        | 210551; 232369                                 |
| Cattle | Oropharyngeal Swab    | 8                         | 210551                                         |
| Cattle | Saliva                | 12                        | 231860                                         |

|        |           |    |        |
|--------|-----------|----|--------|
| Cattle | Semen     | 6  | 232508 |
| Cattle | Serum     | 8  | 210551 |
| Cattle | Stomach   | 8  | 210551 |
| Cattle | Testicles | 12 | 231795 |

(a): The complete reference information is available at: <https://animal-diseases.efsa.europa.eu/LSDV/#page-4>

### Contagious bovine pleuropneumonia

| Host                    | Matrix found positive | Number of animals sampled | refID <sup>(a)</sup>                                   |
|-------------------------|-----------------------|---------------------------|--------------------------------------------------------|
| Bos indicus             | Lymph node            | 19                        | 230175                                                 |
| Bos indicus, Bos taurus | Lung                  | 109                       | 230124; 230130; 230148; 230172; 230175; 230225; 230230 |

(a): The complete reference information is available at: <https://animal-diseases.efsa.europa.eu/CBPP/#page-4>

### Sheep pox and goat pox

There was no evidence from virus isolation studies for this disease/pathogen.<sup>1</sup>

### Peste des petits ruminants

| Host   | Matrix found positive | Number of animals sampled | refID <sup>(a)</sup>           |
|--------|-----------------------|---------------------------|--------------------------------|
| Cattle | Blood                 | 3                         | 210327                         |
| Goats  | Blood                 | 8                         | 210605; 230237; 230420         |
| Goats  | Eye Swab              | 14                        | 210136; 210310; 210824; 230420 |
| Goats  | Faeces                | 2                         | 210136                         |
| Goats  | Intestines            | 6                         | 210824                         |
| Goats  | Kidney                | 6                         | 210824                         |
| Goats  | Lymph node            | 11                        | 210591; 210824                 |
| Goats  | Liver                 | 6                         | 210824                         |
| Goats  | Lung                  | 11                        | 210591; 210824                 |
| Goats  | Nose Nasal Swab       | 17                        | 210331; 210824; 230142; 230420 |
| Goats  | Oropharyngeal Swab    | 6                         | 210824                         |
| Goats  | Skin                  | 6                         | 210336                         |
| Goats  | Spleen                | 6                         | 210824                         |
| Sheep  | Eye Swab              | 11                        | 210136; 210336                 |
| Sheep  | Faeces                | 5                         | 210136                         |
| Sheep  | Nose Nasal Swab       | 14                        | 210136; 210331; 230142         |

(a): The complete reference information is available at: <https://animal-diseases.efsa.europa.eu/PPRV/#page-4>

### Contagious caprine pleuropneumonia

There was not enough evidence for this disease/pathogen.<sup>2</sup>

<sup>1</sup> <https://animal-diseases.efsa.europa.eu/SPPV/#page-4>

<sup>2</sup> <https://animal-diseases.efsa.europa.eu/CCPP/#page-4>



## Classical Swine Fever

| Host          | Matrix found positive                                                       | Number of animals sampled | refID <sup>(a)</sup>                                                                                                                                                                                                                                                                                                                                                                                                   |
|---------------|-----------------------------------------------------------------------------|---------------------------|------------------------------------------------------------------------------------------------------------------------------------------------------------------------------------------------------------------------------------------------------------------------------------------------------------------------------------------------------------------------------------------------------------------------|
| Domestic pigs | Adrenal gland, Blood, Brain, Intestines, Kidney, Lymph node, Spleen, Tonsil | 5                         | 210218                                                                                                                                                                                                                                                                                                                                                                                                                 |
| Domestic pigs | Blood                                                                       | 582                       | 210212; 210252; 210270; 210308; 210309; 210342; 210344; 210374; 210375; 210408; 210427; 210450; 210468; 210475; 210501; 210502; 210509; 210511; 210531; 210556; 210558; 210559; 210562; 210574; 210576; 210577; 210581; 210582; 210583; 210593; 210596; 210609; 210638; 210661; 210677; 210683; 210687; 210690; 210702; 210706; 210712; 210713; 210722; 210736; 210749; 210751; 210755; 210774; 210802; 210803; 231985 |
| Domestic pigs | Blood, Nose Nasal Swab, Rectum Anal Swab                                    | 3                         | 210373                                                                                                                                                                                                                                                                                                                                                                                                                 |
| Domestic pigs | Brain                                                                       | 50                        | 210550                                                                                                                                                                                                                                                                                                                                                                                                                 |
| Domestic pigs | Faeces                                                                      | 84                        | 210308; 210511; 210528; 210683; 231985                                                                                                                                                                                                                                                                                                                                                                                 |
| Domestic pigs | Faeces, Heart, Kidney, Lung, Lymph node, Muscle, Spleen, Tonsil             | 6                         | 210581                                                                                                                                                                                                                                                                                                                                                                                                                 |
| Domestic pigs | Foetus Stillbirth Neonate                                                   | 10                        | 210704                                                                                                                                                                                                                                                                                                                                                                                                                 |
| Domestic pigs | Heart                                                                       | 60                        | 210550; 210683                                                                                                                                                                                                                                                                                                                                                                                                         |
| Domestic pigs | Intestines                                                                  | 6                         | 210565                                                                                                                                                                                                                                                                                                                                                                                                                 |
| Domestic pigs | Intestines, Kidney, Lymph node, Spleen, Tonsil                              | 3                         | 210373                                                                                                                                                                                                                                                                                                                                                                                                                 |
| Domestic pigs | Kidney                                                                      | 88                        | 210501; 210550; 210556; 210565; 210593; 210627; 210683                                                                                                                                                                                                                                                                                                                                                                 |
| Domestic pigs | Lymph node                                                                  | 88                        | 210493; 210501; 210550; 210556; 210565; 210587; 210593; 210627                                                                                                                                                                                                                                                                                                                                                         |
| Domestic pigs | Liver                                                                       | 10                        | 210683                                                                                                                                                                                                                                                                                                                                                                                                                 |
| Domestic pigs | Lung                                                                        | 54                        | 210550; 210556                                                                                                                                                                                                                                                                                                                                                                                                         |
| Domestic pigs | Muscle                                                                      | 55                        | 210550; 210674                                                                                                                                                                                                                                                                                                                                                                                                         |
| Domestic pigs | Nose Nasal Swab                                                             | 125                       | 210270; 210308; 210427; 210450; 210501; 210556; 210576; 210582; 210593; 210683; 210774; 231985                                                                                                                                                                                                                                                                                                                         |

|               |                   |     |                                                                                                                |
|---------------|-------------------|-----|----------------------------------------------------------------------------------------------------------------|
| Domestic pigs | Oroparhyngal Swab | 173 | 210344; 210374; 210468; 210511; 210528; 210560; 210596; 210638; 210713; 210732; 210736                         |
| Domestic pigs | Rectum Anal Swab  | 3   | 210270                                                                                                         |
| Domestic pigs | Saliva            | 2   | 210556                                                                                                         |
| Domestic pigs | Salivary gland    | 10  | 210413                                                                                                         |
| Domestic pigs | Serum             | 119 | 210168; 210304; 210413; 210474; 210517; 210565; 210587; 210596; 210615; 210628; 210638; 210674; 210712; 210817 |
| Domestic pigs | Skin              | 7   | 210592                                                                                                         |
| Domestic pigs | Spleen            | 127 | 210046; 210212; 210413; 210493; 210501; 210550; 210556; 210565; 210574; 210593; 210627; 210674; 210683         |
| Domestic pigs | Testicles         | 5   | 210684                                                                                                         |
| Domestic pigs | Tonsil            | 208 | 210212; 210396; 210413; 210427; 210450; 210501; 210509; 210550; 210556; 210565; 210593; 210683                 |
| Wild boar     | Blood             | 14  | 210556; 210582; 210701                                                                                         |
| Wild boar     | Kidney            | 3   | 210556                                                                                                         |
| Wild boar     | Lymph node        | 3   | 210556                                                                                                         |
| Wild boar     | Lung              | 3   | 210556                                                                                                         |
| Wild boar     | Nose Nasal Swab   | 3   | 210556; 210582                                                                                                 |
| Wild boar     | Semen             | 6   | 210643; 232524                                                                                                 |
| Wild boar     | Skin              | 6   | 210592                                                                                                         |
| Wild boar     | Spleen            | 3   | 210556                                                                                                         |
| Wild boar     | Tonsil            | 3   | 210556                                                                                                         |

(a): The complete reference information is available at: <https://animal-diseases.efsa.europa.eu/CSFV/#page-4>

### African Swine Fever

| Host          | Matrix found positive | Number of animals sampled | refID <sup>(a)</sup>                                                                                                                                                                                                                                                                                                                     |
|---------------|-----------------------|---------------------------|------------------------------------------------------------------------------------------------------------------------------------------------------------------------------------------------------------------------------------------------------------------------------------------------------------------------------------------|
| Domestic pigs | Blood                 | 659                       | 36; 92; 238; 251; 388; 460; 667; 832; 1442; 1588; 1930; 1959; 2053; 2227; 2347; 2513; 2545; 2577; 2595; 2693; 2903; 3123; 3146; 3187; 3220; 3298; 3339; 3356; 3358; 3359; 3360; 3364; 3856; 3987; 202062; 202388; 202559; 202608; 204000; 210721; 210783; 210800; 210808; 210821; 230434; 230447; 230461; 230462; 230540; 230548; 230576 |

| Host          | Matrix found positive               | Number of animals sampled | refID <sup>(a)</sup>                                                             |
|---------------|-------------------------------------|---------------------------|----------------------------------------------------------------------------------|
| Domestic pigs | Bone marrow                         | 34                        | 3187; 3987; 230576                                                               |
| Domestic pigs | Brain                               | 22                        | 3187; 3987                                                                       |
| Domestic pigs | Cervix, Ovary, Uterus, Vagina       | 6                         | 3187                                                                             |
| Domestic pigs | Eye Swab                            | 10                        | 667                                                                              |
| Domestic pigs | Faeces                              | 40                        | 667                                                                              |
| Domestic pigs | Foetus Stillbirth Neonate           | 39                        | 3187                                                                             |
| Domestic pigs | Heart                               | 24                        | 36; 3187; 230576                                                                 |
| Domestic pigs | Kidney                              | 64                        | 36; 2513; 3187; 3987; 230548; 230576                                             |
| Domestic pigs | Lymph node                          | 120                       | 36; 902; 1442; 2513; 2545; 2577; 2595; 3187; 3987; 230548; 230555; 230576        |
| Domestic pigs | Liver                               | 50                        | 36; 1442; 2545; 3187; 3987; 230576                                               |
| Domestic pigs | Lung                                | 78                        | 36; 1442; 2513; 3187; 3987; 230555; 230576                                       |
| Domestic pigs | Muscle                              | 10                        | 3187; 230548                                                                     |
| Domestic pigs | Nose Nasal Swab                     | 108                       | 388; 460; 667; 1930; 3123; 3358; 202559                                          |
| Domestic pigs | Oroparhyngal Swab                   | 82                        | 667; 2053; 3123; 3358                                                            |
| Domestic pigs | Peyer Patches                       | 6                         | 2545                                                                             |
| Domestic pigs | Placenta, Foetus Stillbirth Neonate | 13                        | 3187                                                                             |
| Domestic pigs | Salivary gland                      | 12                        | 230555                                                                           |
| Domestic pigs | Serum                               | 62                        | 202143; 202401; 230576                                                           |
| Domestic pigs | Spleen                              | 133                       | 36; 902; 1442; 2513; 2545; 2577; 2595; 3187; 3987; 230548; 230555; 230576        |
| Domestic pigs | Thymus                              | 12                        | 2545; 3187                                                                       |
| Domestic pigs | Tonsil                              | 149                       | 36; 460; 902; 1930; 2513; 2545; 2577; 3187; 3987; 202062; 230548; 230555; 230576 |

| Host          | Matrix found positive | Number of animals sampled | refID <sup>(a)</sup> |
|---------------|-----------------------|---------------------------|----------------------|
| Domestic pigs | Vagina                | 28                        | 667; 3358            |
| Wild boar     | Blood                 | 12                        | 92                   |
| Wild boar     | Lymph node            | 15                        | 202100; 230555       |
| Wild boar     | Lung                  | 13                        | 202100; 230555       |
| Wild boar     | Salivary gland        | 13                        | 202100; 230555       |
| Wild boar     | Serum                 | 10                        | 202100               |
| Wild boar     | Spleen                | 27                        | 92; 202100; 230555   |
| Wild boar     | Tonsil                | 13                        | 202100; 230555       |

(a): The complete reference information is available at: <https://animal-diseases.efsa.europa.eu/ASFV/#page-5>

### African Horse Sickness

| Host   | Matrix found positive | Number of animals sampled | refID <sup>(a)</sup>                     |
|--------|-----------------------|---------------------------|------------------------------------------|
| Horses | Blood                 | 46                        | 2624; 2838; 2842; 2944; 2950; 3871; 3900 |
| Horses | Heart                 | 1                         | 2950                                     |
| Horses | Lymph node            | 2                         | 2950                                     |
| Horses | Liver                 | 1                         | 2950                                     |
| Horses | Lung                  | 4                         | 2950; 3427                               |
| Horses | Salivary gland        | 1                         | 2950                                     |
| Horses | Spleen                | 10                        | 2838; 2950; 3427; 3871                   |

(a): The complete reference information is available at: <https://animal-diseases.efsa.europa.eu/AHSV/#page-5>

### Highly Pathogenic Avian Influenza

| Host     | Matrix found positive                                   | Number of animals sampled | refID <sup>(a)</sup>                                                                                                                                                                                                                                                                                                                                                                                           |
|----------|---------------------------------------------------------|---------------------------|----------------------------------------------------------------------------------------------------------------------------------------------------------------------------------------------------------------------------------------------------------------------------------------------------------------------------------------------------------------------------------------------------------------|
| Chickens | Blood                                                   | 102                       | 230693; 230702; 230718; 230839; 230910; 230969; 231106; 231578                                                                                                                                                                                                                                                                                                                                                 |
| Chickens | Bone Marrow                                             | 42                        | 231592                                                                                                                                                                                                                                                                                                                                                                                                         |
| Chickens | Brain                                                   | 917                       | 220577; 230629; 230669; 230688; 230692; 230693; 230697; 230702; 230704; 230714; 230718; 230729; 230733; 230737; 230794; 230797; 230816; 230823; 230839; 230844; 230849; 230877; 230885; 230910; 230923; 230936; 230942; 230943; 230969; 230982; 230991; 231016; 231033; 231048; 231100; 231106; 231117; 231124; 231128; 231131; 231138; 231257; 231345; 231425; 231512; 231531; 231534; 231578; 231592; 231599 |
| Chickens | Brain, Heart, Kidney, Liver, Lung, Cloacal Swab, Spleen | 33                        | 231527                                                                                                                                                                                                                                                                                                                                                                                                         |
| Chickens | Bursa fabricii                                          | 106                       | 220577; 230688; 230794; 230969; 230991; 231100; 231512; 231534                                                                                                                                                                                                                                                                                                                                                 |

| Host     | Matrix found positive | Number of animals sampled | refID <sup>(a)</sup>                                                                                                                                                                                                                                                                                                                                                                                                                                                   |
|----------|-----------------------|---------------------------|------------------------------------------------------------------------------------------------------------------------------------------------------------------------------------------------------------------------------------------------------------------------------------------------------------------------------------------------------------------------------------------------------------------------------------------------------------------------|
| Chickens | Esophageal Swab       | 10                        | 231100                                                                                                                                                                                                                                                                                                                                                                                                                                                                 |
| Chickens | Eye Swab              | 44                        | 230693; 230718                                                                                                                                                                                                                                                                                                                                                                                                                                                         |
| Chickens | Feathers              | 53                        | 230843; 230986; 231345                                                                                                                                                                                                                                                                                                                                                                                                                                                 |
| Chickens | Heart                 | 572                       | 230693; 230702; 230718; 230733; 230737; 230794; 230797; 230823; 230849; 230877; 230885; 230910; 230923; 230942; 230943; 230969; 230982; 230991; 231016; 231033; 231100; 231114; 231124; 231138; 231257; 231425; 231511; 231531; 231534; 231599                                                                                                                                                                                                                         |
| Chickens | Intestines            | 385                       | 220577; 230629; 230669; 230688; 230697; 230714; 230718; 230729; 230733; 230737; 230823; 230839; 230844; 230877; 230885; 230910; 230936; 231016; 231100; 231257; 231320; 231425; 231498; 231512; 231531; 231563; 231578; 231603                                                                                                                                                                                                                                         |
| Chickens | Kidney                | 763                       | 230629; 230669; 230688; 230692; 230693; 230697; 230702; 230704; 230714; 230718; 230729; 230733; 230737; 230794; 230797; 230823; 230839; 230844; 230849; 230877; 230885; 230910; 230923; 230936; 230942; 230943; 230969; 230982; 230991; 231016; 231033; 231048; 231100; 231117; 231124; 231131; 231257; 231320; 231421; 231425; 231498; 231505; 231512; 231531; 231534; 231563; 231578; 231592; 231603                                                                 |
| Chickens | Liver                 | 609                       | 230629; 230688; 230692; 230693; 230697; 230702; 230704; 230718; 230729; 230733; 230737; 230794; 230797; 230823; 230843; 230849; 230877; 230885; 230910; 230923; 230942; 230943; 230969; 230982; 230991; 231016; 231033; 231100; 231114; 231117; 231128; 231425; 231512; 231534; 231578; 231603                                                                                                                                                                         |
| Chickens | Lung                  | 1,120                     | 220551; 220577; 230610; 230629; 230669; 230688; 230692; 230693; 230697; 230702; 230704; 230714; 230718; 230729; 230733; 230737; 230794; 230797; 230814; 230816; 230823; 230839; 230844; 230849; 230877; 230885; 230910; 230923; 230933; 230936; 230942; 230943; 230969; 230982; 230991; 231016; 231033; 231048; 231100; 231106; 231117; 231124; 231128; 231131; 231138; 231257; 231320; 231421; 231425; 231512; 231531; 231534; 231578; 231592; 231599; 231602; 231603 |
| Chickens | Muscle                | 323                       | 230669; 230693; 230718; 230843; 230910; 230923; 230982; 231124; 231138; 231345; 231511; 231512; 231602                                                                                                                                                                                                                                                                                                                                                                 |

| Host     | Matrix found positive            | Number of animals sampled | refID <sup>(a)</sup>                                                                                                                                                                                                                                                                                                                                                                                                                                                                                                                                                                                                                                                           |
|----------|----------------------------------|---------------------------|--------------------------------------------------------------------------------------------------------------------------------------------------------------------------------------------------------------------------------------------------------------------------------------------------------------------------------------------------------------------------------------------------------------------------------------------------------------------------------------------------------------------------------------------------------------------------------------------------------------------------------------------------------------------------------|
| Chickens | Nasal Swab                       | 21                        | 230885                                                                                                                                                                                                                                                                                                                                                                                                                                                                                                                                                                                                                                                                         |
| Chickens | Oropharyngeal Swab               | 915                       | 220087; 220292; 220577; 220933; 230609; 230688; 230692; 230700; 230704; 230733; 230737; 230744; 230754; 230765; 230794; 230797; 230823; 230830; 230837; 230839; 230849; 230852; 230854; 230935; 230936; 230943; 230981; 230982; 230986; 230991; 231016; 231033; 231048; 231100; 231114; 231115; 231117; 231128; 231138; 231257; 231342; 231345; 231369; 231416; 231531; 231533; 231599; 231602; 231603                                                                                                                                                                                                                                                                         |
| Chickens | Oropharyngeal Swab, Cloacal Swab | 20                        | 231450                                                                                                                                                                                                                                                                                                                                                                                                                                                                                                                                                                                                                                                                         |
| Chickens | Pancreas                         | 278                       | 230688; 230693; 230702; 230718; 230733; 230794; 230823; 230877; 230923; 230969; 230982; 230991; 231138; 231425; 231512; 231534; 231578                                                                                                                                                                                                                                                                                                                                                                                                                                                                                                                                         |
| Chickens | Cloacal Swab                     | 1,531                     | 220080; 220087; 220292; 220577; 220933; 221063; 230593; 230609; 230688; 230692; 230693; 230700; 230702; 230704; 230711; 230714; 230718; 230733; 230737; 230744; 230754; 230765; 230794; 230797; 230800; 230814; 230816; 230823; 230830; 230837; 230839; 230844; 230849; 230854; 230872; 230885; 230925; 230935; 230936; 230943; 230969; 230981; 230982; 230986; 230991; 231016; 231033; 231037; 231048; 231069; 231100; 231114; 231115; 231117; 231128; 231138; 231257; 231262; 231315; 231320; 231342; 231345; 231357; 231369; 231416; 231420; 231425; 231437; 231456; 231457; 231498; 231505; 231531; 231533; 231539; 231563; 231590; 231599; 231602; 231603; 231608; 231611 |
| Chickens | Skin                             | 15                        | 231345                                                                                                                                                                                                                                                                                                                                                                                                                                                                                                                                                                                                                                                                         |
| Chickens | Spleen                           | 686                       | 220551; 230629; 230688; 230692; 230693; 230702; 230704; 230718; 230729; 230733; 230737; 230794; 230797; 230823; 230844; 230849; 230877; 230885; 230910; 230923; 230933; 230942; 230943; 230969; 230982; 230991; 231016; 231033; 231100; 231106; 231117; 231124; 231131; 231138; 231257; 231421; 231425; 231512; 231531; 231534; 231603                                                                                                                                                                                                                                                                                                                                         |
| Chickens | Thymus                           | 40                        | 230991; 231100; 231512                                                                                                                                                                                                                                                                                                                                                                                                                                                                                                                                                                                                                                                         |

| Host     | Matrix found positive | Number of animals sampled | refID <sup>(a)</sup>                                                                                                                                                                                                                                                                                                   |
|----------|-----------------------|---------------------------|------------------------------------------------------------------------------------------------------------------------------------------------------------------------------------------------------------------------------------------------------------------------------------------------------------------------|
| Chickens | Trachea               | 550                       | 230629; 230669; 230688; 230692; 230693; 230697; 230702; 230704; 230714; 230718; 230733; 230794; 230823; 230839; 230844; 230910; 230923; 230936; 230982; 230991; 231100; 231117; 231124; 231131; 231320; 231425; 231498; 231505; 231512; 231531; 231534; 231563; 231578; 231602; 231603                                 |
| Ducks    | Blood                 | 38                        | 230693; 230711; 231113                                                                                                                                                                                                                                                                                                 |
| Ducks    | Brain                 | 842                       | 220933; 230605; 230669; 230693; 230711; 230737; 230754; 230791; 230794; 230839; 230936; 230987; 230991; 231004; 231016; 231032; 231033; 231048; 231070; 231083; 231102; 231124; 231128; 231142; 231178; 231248; 231251; 231257; 231519; 231526; 231578; 231583; 231599                                                 |
| Ducks    | Bursa fabricii        | 121                       | 230605; 230794; 230987; 230991; 231033; 231083; 231251                                                                                                                                                                                                                                                                 |
| Ducks    | Eye Swab              | 30                        | 230693; 231032                                                                                                                                                                                                                                                                                                         |
| Ducks    | Feathers              | 41                        | 230986; 231350                                                                                                                                                                                                                                                                                                         |
| Ducks    | Heart                 | 580                       | 230693; 230711; 230737; 230794; 230797; 230882; 230987; 230991; 231004; 231016; 231032; 231033; 231035; 231070; 231102; 231124; 231138; 231178; 231257; 231526; 231583; 231599                                                                                                                                         |
| Ducks    | Intestines            | 198                       | 230669; 230737; 230839; 230882; 230936; 230987; 231016; 231032; 231033; 231035; 231142; 231257; 231578                                                                                                                                                                                                                 |
| Ducks    | Kidney                | 651                       | 230605; 230669; 230693; 230711; 230733; 230737; 230754; 230794; 230797; 230839; 230936; 230987; 230991; 231004; 231016; 231032; 231033; 231048; 231070; 231083; 231113; 231124; 231128; 231142; 231178; 231248; 231251; 231257; 231519; 231578; 231583                                                                 |
| Ducks    | Liver                 | 372                       | 230693; 230711; 230733; 230737; 230754; 230794; 230797; 230987; 230991; 231004; 231016; 231033; 231070; 231142; 231178; 231519; 231578                                                                                                                                                                                 |
| Ducks    | Lung                  | 1,036                     | 220933; 230605; 230669; 230693; 230711; 230733; 230737; 230754; 230791; 230794; 230797; 230839; 230882; 230936; 230987; 230991; 231004; 231016; 231032; 231033; 231035; 231048; 231070; 231083; 231102; 231113; 231124; 231128; 231138; 231142; 231178; 231248; 231251; 231257; 231519; 231526; 231578; 231583; 231599 |

| Host    | Matrix found positive                                   | Number of animals sampled | refID <sup>(a)</sup>                                                                                                                                                                                                                                                                                                                                                                                           |
|---------|---------------------------------------------------------|---------------------------|----------------------------------------------------------------------------------------------------------------------------------------------------------------------------------------------------------------------------------------------------------------------------------------------------------------------------------------------------------------------------------------------------------------|
| Ducks   | Muscle                                                  | 282                       | 230669; 230693; 231004; 231035; 231102; 231124; 231128; 231138; 231178; 231526; 231583                                                                                                                                                                                                                                                                                                                         |
| Ducks   | Nasal Swab                                              | 4                         | 230987                                                                                                                                                                                                                                                                                                                                                                                                         |
| Ducks   | Oropharyngeal Swab                                      | 1,071                     | 220933; 230605; 230697; 230725; 230733; 230737; 230754; 230781; 230791; 230794; 230797; 230830; 230839; 230854; 230882; 230936; 230986; 230987; 230991; 231004; 231016; 231032; 231033; 231035; 231048; 231070; 231124; 231128; 231138; 231177; 231178; 231251; 231257; 231390; 231405; 231467; 231470; 231519; 231526; 231561; 231583; 231599; 231606; 231615                                                 |
| Ducks   | Oropharyngeal Swab, Cloacal Swab                        | 30                        | 231450                                                                                                                                                                                                                                                                                                                                                                                                         |
| Ducks   | Pancreas                                                | 289                       | 230605; 230693; 230711; 230733; 230794; 230987; 230991; 231004; 231032; 231035; 231083; 231138; 231251; 231519                                                                                                                                                                                                                                                                                                 |
| Ducks   | Cloacal Swab                                            | 1,108                     | 220933; 230605; 230693; 230697; 230711; 230718; 230725; 230733; 230737; 230754; 230781; 230791; 230794; 230797; 230830; 230839; 230854; 230882; 230936; 230969; 230986; 230987; 230991; 231004; 231016; 231032; 231033; 231035; 231048; 231069; 231070; 231113; 231124; 231128; 231177; 231178; 231251; 231257; 231390; 231405; 231467; 231470; 231476; 231519; 231526; 231537; 231561; 231583; 231599; 231606 |
| Ducks   | Spinal Cord                                             | 4                         | 230987                                                                                                                                                                                                                                                                                                                                                                                                         |
| Ducks   | Spleen                                                  | 659                       | 230605; 230693; 230711; 230737; 230754; 230791; 230794; 230797; 230987; 230991; 231004; 231016; 231032; 231033; 231035; 231070; 231083; 231102; 231124; 231128; 231138; 231178; 231251; 231257; 231519                                                                                                                                                                                                         |
| Ducks   | Thymus                                                  | 32                        | 230605; 230991                                                                                                                                                                                                                                                                                                                                                                                                 |
| Ducks   | Tonsil                                                  | 8                         | 230605                                                                                                                                                                                                                                                                                                                                                                                                         |
| Ducks   | Trachea                                                 | 400                       | 230605; 230669; 230693; 230711; 230733; 230794; 230839; 230882; 230936; 230987; 230991; 231004; 231033; 231035; 231070; 231113; 231124; 231142; 231248; 231519; 231578                                                                                                                                                                                                                                         |
| Pigeons | Brain                                                   | 158                       | 230823; 231038; 231265; 231483; 231531                                                                                                                                                                                                                                                                                                                                                                         |
| Pigeons | Brain, Heart, Kidney, Liver, Lung, Cloacal Swab, Spleen | 26                        | 231527                                                                                                                                                                                                                                                                                                                                                                                                         |
| Pigeons | Bursa fabricii                                          | 48                        | 231483                                                                                                                                                                                                                                                                                                                                                                                                         |



| <b>Host</b>                  | <b>Matrix found positive</b>     | <b>Number of animals sampled</b> | <b>refID<sup>(a)</sup></b>                     |
|------------------------------|----------------------------------|----------------------------------|------------------------------------------------|
| Pigeons                      | Heart                            | 118                              | 230823; 231483; 231531                         |
| Pigeons                      | Intestines                       | 28                               | 230823; 231038; 231531                         |
| Pigeons                      | Kidney                           | 184                              | 230823; 231265; 231483; 231531                 |
| Pigeons                      | Liver                            | 136                              | 230823; 231265; 231483                         |
| Pigeons                      | Lung                             | 200                              | 230823; 231265; 231483; 231531                 |
| Pigeons                      | Oropharyngeal Swab               | 43                               | 230823; 231038; 231466; 231531                 |
| Pigeons                      | Pancreas                         | 102                              | 230823; 231483                                 |
| Pigeons                      | Cloacal Swab                     | 188                              | 230823; 231038; 231265; 231466; 231483; 231531 |
| Pigeons                      | Spleen                           | 120                              | 230823; 231265; 231483; 231531                 |
| Pigeons                      | Trachea                          | 134                              | 230823; 231483; 231531                         |
| Raptor birds - Birds of prey | Brain                            | 6                                | 230664                                         |
| Raptor birds - Birds of prey | Feathers                         | 6                                | 230664                                         |
| Raptor birds - Birds of prey | Heart                            | 6                                | 230664                                         |
| Raptor birds - Birds of prey | Intestines                       | 6                                | 230664                                         |
| Raptor birds - Birds of prey | Kidney                           | 6                                | 230664                                         |
| Raptor birds - Birds of prey | Liver                            | 6                                | 230664                                         |
| Raptor birds - Birds of prey | Lung                             | 6                                | 230664                                         |
| Raptor birds - Birds of prey | Oropharyngeal Swab               | 27                               | 230664; 231404; 231560                         |
| Raptor birds - Birds of prey | Oropharyngeal Swab, Cloacal Swab | 17                               | 231450                                         |

| Host                         | Matrix found positive | Number of animals sampled | refID <sup>(a)</sup>   |
|------------------------------|-----------------------|---------------------------|------------------------|
| Raptor birds - Birds of prey | Pancreas              | 6                         | 230664                 |
| Raptor birds - Birds of prey | Cloacal Swab          | 27                        | 230664; 231404; 231560 |
| Raptor birds - Birds of prey | Spleen                | 6                         | 230664                 |
| Raptor birds - Birds of prey | Trachea               | 6                         | 230664                 |
| Turkeys                      | Blood                 | 15                        | 231488                 |
| Turkeys                      | Brain                 | 12                        | 231048                 |
| Turkeys                      | Kidney                | 12                        | 231048                 |
| Turkeys                      | Lung                  | 27                        | 231048; 231488         |
| Turkeys                      | Oropharyngeal Swab    | 117                       | 230700; 230840; 231048 |
| Turkeys                      | Cloacal Swab          | 117                       | 230700; 230840; 231048 |

(a): The complete reference information is available at: <https://animal-diseases.efsa.europa.eu/HPAI/#page-4>

### Newcastle Disease

| Host     | Matrix found positive | Number of animals sampled | refID <sup>(a)</sup>                                                                                           |
|----------|-----------------------|---------------------------|----------------------------------------------------------------------------------------------------------------|
| Chickens | Blood                 | 26                        | 221137; 221366                                                                                                 |
| Chickens | Brain                 | 280                       | 220109; 220134; 220266; 220360; 220369; 220393; 220406; 220520; 220575; 220629; 220833; 221280; 221281; 221309 |
| Chickens | Bursa fabricii        | 180                       | 220109; 220369; 220520; 220629; 221280; 221281                                                                 |
| Chickens | Faeces                | 16                        | 221137                                                                                                         |
| Chickens | Heart                 | 58                        | 220629; 220722; 221137                                                                                         |
| Chickens | Intestines            | 122                       | 220369; 220406; 220629                                                                                         |
| Chickens | Kidney                | 181                       | 220109; 220406; 220520; 220629; 220722; 221137; 221280; 221281; 221309                                         |
| Chickens | Liver                 | 117                       | 220109; 220629; 220722; 221280; 221281; 221309                                                                 |
| Chickens | Lung                  | 257                       | 220109; 220266; 220406; 220520; 220551; 220575; 220629; 220722; 220833; 221280; 221281; 221309; 221471         |

| Host      | Matrix found positive | Number of animals sampled | refID <sup>(a)</sup>                                                                                                                                                                                                                                                                                                                           |
|-----------|-----------------------|---------------------------|------------------------------------------------------------------------------------------------------------------------------------------------------------------------------------------------------------------------------------------------------------------------------------------------------------------------------------------------|
| Chickens  | Oropharyngeal Swab    | 516                       | 220083; 220109; 220141; 220197; 220222; 220266; 220289; 220292; 220321; 220421; 220433; 220460; 220496; 220500; 220520; 220557; 220572; 220575; 220629; 220660; 220714; 221011; 221016; 221085; 221119; 221310                                                                                                                                 |
| Chickens  | Ovary                 | 12                        | 220524                                                                                                                                                                                                                                                                                                                                         |
| Chickens  | Pancreas              | 12                        | 220629                                                                                                                                                                                                                                                                                                                                         |
| Chickens  | Cloacal Swab          | 775                       | 220080; 220083; 220109; 220141; 220197; 220204; 220222; 220251; 220289; 220292; 220321; 220391; 220393; 220421; 220433; 220447; 220453; 220495; 220496; 220500; 220520; 220524; 220557; 220572; 220575; 220601; 220629; 220685; 220714; 220833; 220840; 220897; 221011; 221016; 221052; 221085; 221119; 221165; 221309; 221310; 221314; 231420 |
| Chickens  | Spleen                | 381                       | 220109; 220313; 220369; 220393; 220406; 220520; 220551; 220575; 220629; 220722; 220833; 221137; 221280; 221281; 221309                                                                                                                                                                                                                         |
| Chickens  | Stomach               | 10                        | 220109                                                                                                                                                                                                                                                                                                                                         |
| Chickens  | Thymus                | 140                       | 220369; 220520; 220575; 220629                                                                                                                                                                                                                                                                                                                 |
| Chickens  | Tonsil                | 68                        | 220393; 220520; 220629; 221281                                                                                                                                                                                                                                                                                                                 |
| Chickens  | Trachea               | 143                       | 220109; 220266; 220520; 220629; 220833; 221280; 221281; 221309                                                                                                                                                                                                                                                                                 |
| Chickens  | Uterus                | 12                        | 220524                                                                                                                                                                                                                                                                                                                                         |
| Chickens  | Vagina                | 12                        | 220524                                                                                                                                                                                                                                                                                                                                         |
| Ducks     | Brain                 | 95                        | 220607; 220629; 220631; 220755                                                                                                                                                                                                                                                                                                                 |
| Ducks     | Bursa fabricii        | 206                       | 220520; 220607; 220629; 220631; 220755                                                                                                                                                                                                                                                                                                         |
| Ducks     | Heart                 | 79                        | 220629; 220631; 220755                                                                                                                                                                                                                                                                                                                         |
| Ducks     | Intestines            | 62                        | 220607; 220629; 220631                                                                                                                                                                                                                                                                                                                         |
| Ducks     | Kidney                | 148                       | 220520; 220629; 220631; 220755                                                                                                                                                                                                                                                                                                                 |
| Ducks     | Liver                 | 28                        | 220755                                                                                                                                                                                                                                                                                                                                         |
| Ducks     | Lung                  | 136                       | 220520; 220607; 220629; 220631; 220755                                                                                                                                                                                                                                                                                                         |
| Ducks     | Oropharyngeal Swab    | 241                       | 220520; 220629; 220631; 220755                                                                                                                                                                                                                                                                                                                 |
| Ducks     | Pancreas              | 144                       | 220629; 220631; 220755                                                                                                                                                                                                                                                                                                                         |
| Ducks     | Cloacal Swab          | 205                       | 220520; 220629; 220631; 220755; 221102                                                                                                                                                                                                                                                                                                         |
| Ducks     | Spleen                | 122                       | 220520; 220607; 220629; 220631; 220755                                                                                                                                                                                                                                                                                                         |
| Ducks     | Thymus                | 178                       | 220520; 220607; 220629; 220631; 220755                                                                                                                                                                                                                                                                                                         |
| Ducks     | Tonsil                | 66                        | 220520; 220607; 220629                                                                                                                                                                                                                                                                                                                         |
| Ducks     | Trachea               | 80                        | 220520; 220629; 220631                                                                                                                                                                                                                                                                                                                         |
| Ostriches | Bone Marrow           | 10                        | 221354                                                                                                                                                                                                                                                                                                                                         |
| Ostriches | Muscle                | 10                        | 221354                                                                                                                                                                                                                                                                                                                                         |
| Pigeons   | Brain                 | 24                        | 220216; 220520                                                                                                                                                                                                                                                                                                                                 |
| Pigeons   | Bursa fabricii        | 24                        | 220216; 220520                                                                                                                                                                                                                                                                                                                                 |

| Host    | Matrix found positive | Number of animals sampled | refID <sup>(a)</sup>           |
|---------|-----------------------|---------------------------|--------------------------------|
| Pigeons | Kidney                | 30                        | 220216; 220520                 |
| Pigeons | Lung                  | 30                        | 220216; 220520                 |
| Pigeons | Oropharyngeal Swab    | 90                        | 220141; 220388; 220520; 221119 |
| Pigeons | Cloacal Swab          | 96                        | 220141; 220388; 220520; 221119 |
| Pigeons | Spleen                | 30                        | 220216; 220520                 |
| Pigeons | Thymus                | 18                        | 220520                         |
| Pigeons | Tonsil                | 18                        | 220520                         |
| Pigeons | Trachea               | 24                        | 220216; 220520                 |
| Turkeys | Oropharyngeal Swab    | 16                        | 221119                         |
| Turkeys | Cloacal Swab          | 76                        | 221119; 221314                 |

(a): The complete reference information is available at: <https://animal-diseases.efsa.europa.eu/NDV/#page-4>

### 3.1.2 Surveillance studies

#### Foot and Mouth Disease

27 publications studying the survival of FMDV in various products and materials have been identified by the ELS<sup>3</sup>. The findings are presented in a survival plot indicating the maximum number of days the virus was detected by virus isolation in different matrices under different conditions (temperature). Further, results from half-life studies which documented virus viability decay over time under different temperatures are shown.

A meta-analysis of FMDV survival in different matrices was done to account explicitly for the effect of censoring, that is, studies which were interrupted while the agent was still detectable in the matrices investigated. Only studies with temperature between 0 and 30 degrees Celsius (materials not frozen or heated) were eligible, as comparisons among studies with larger temperature variation would not be meaningful. Plots show the parametric confidence intervals for the mean survival time when at least 4 study groups are reported and the interquartile ranges (IQ, Q1-Q3). The exact number for these intervals for each of the matrices reported is shown in a table.

<sup>3</sup> <https://animal-diseases.efsa.europa.eu/FMDV/#page-3>

### Survival plot – virus isolation in days after animal infection

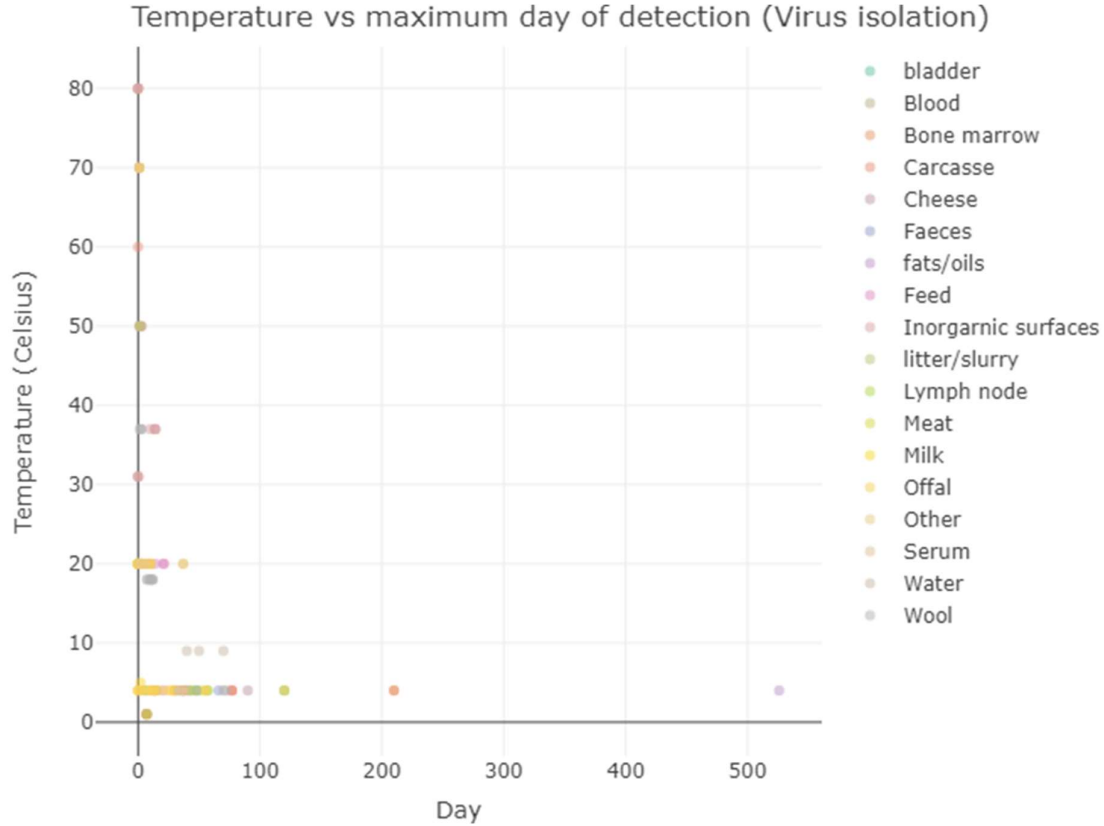

### Half-live study plot – virus isolation

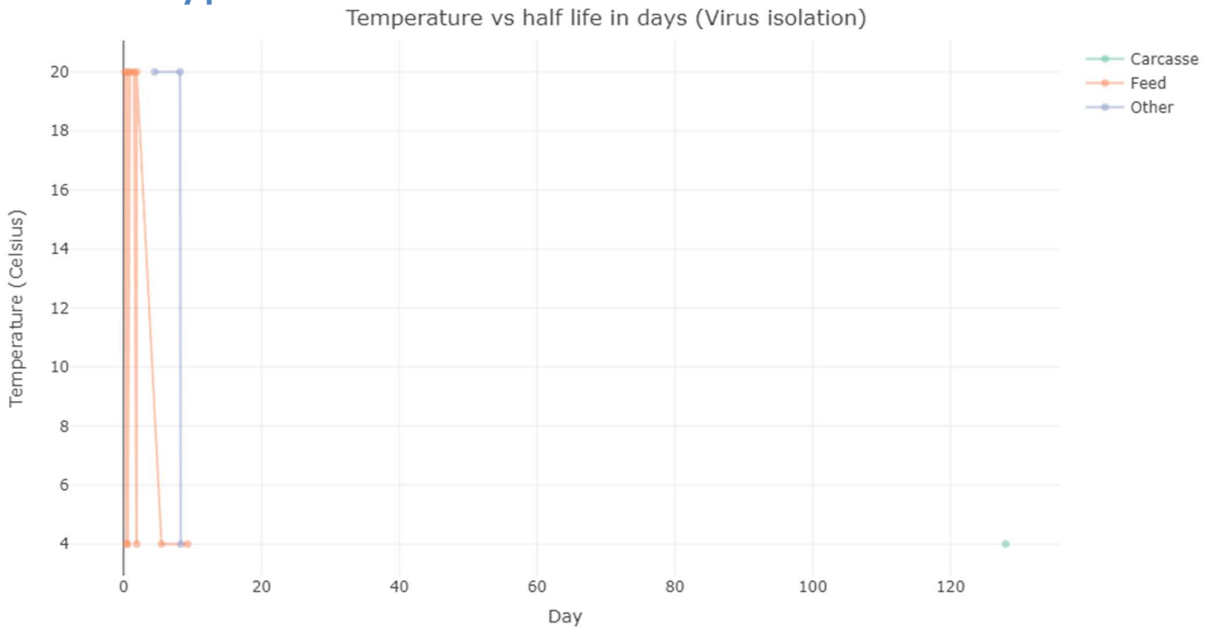

### Meta-analysis - Virus detection (0-30°C) (parametric intervals)

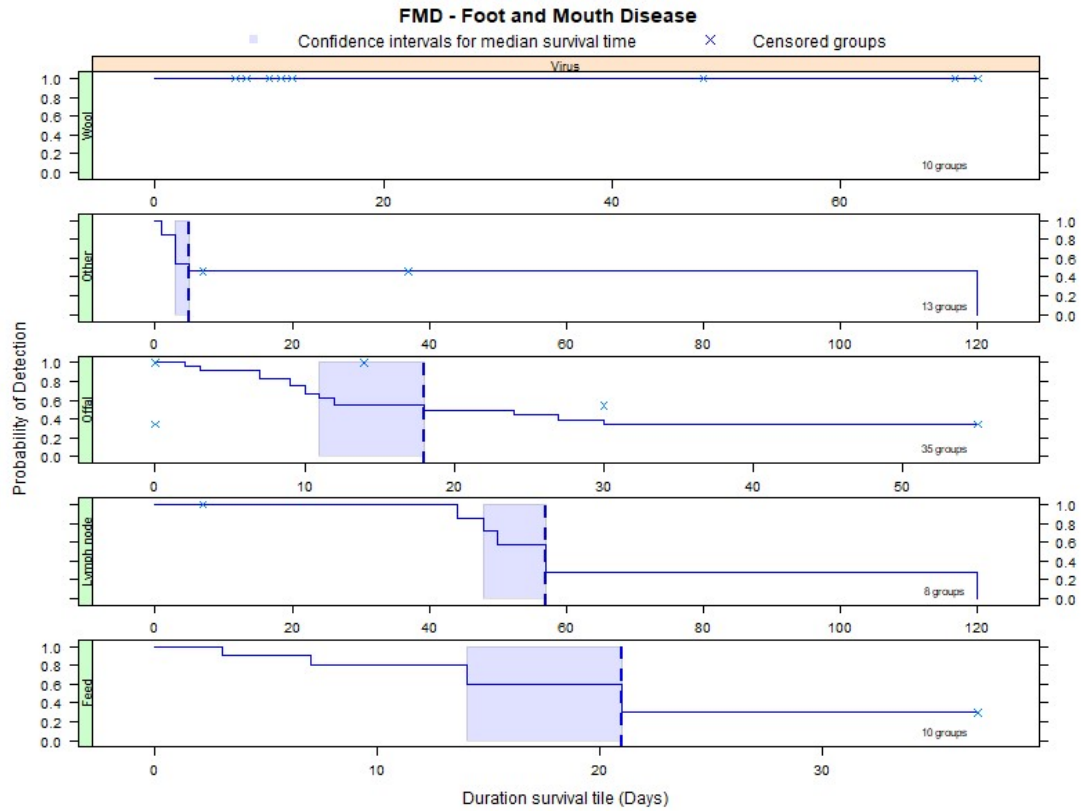

### Meta-analysis - Virus detection (0-30°C) (IQ range)

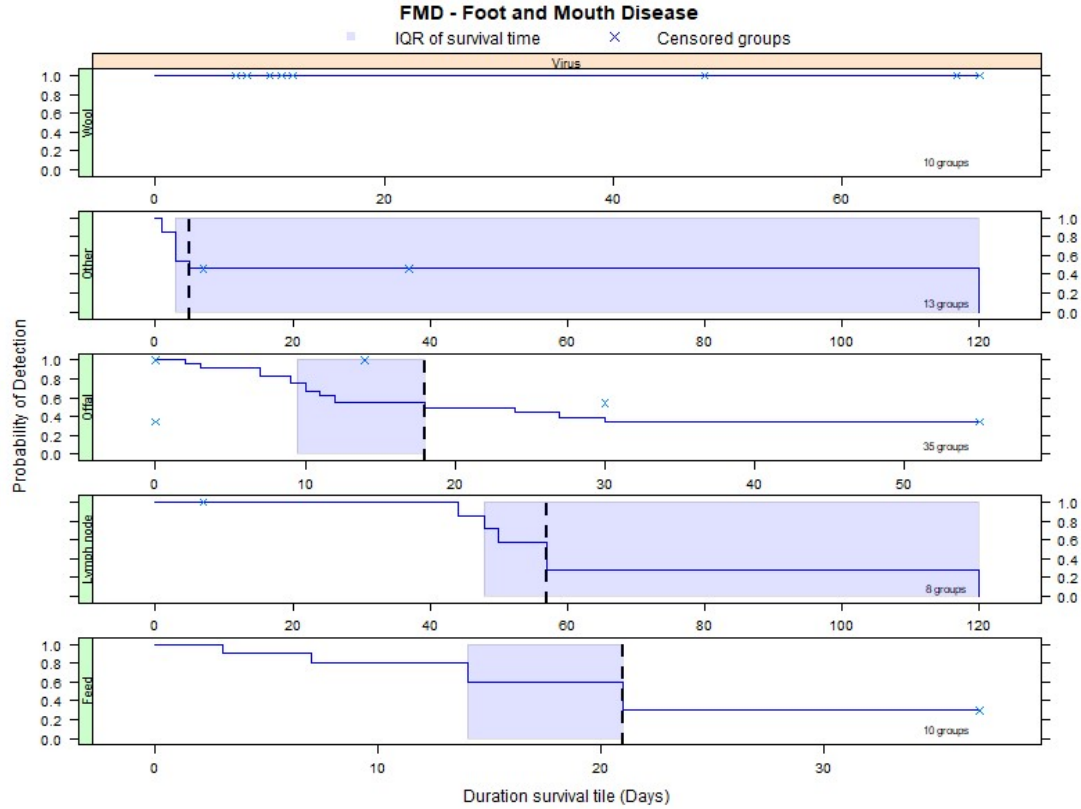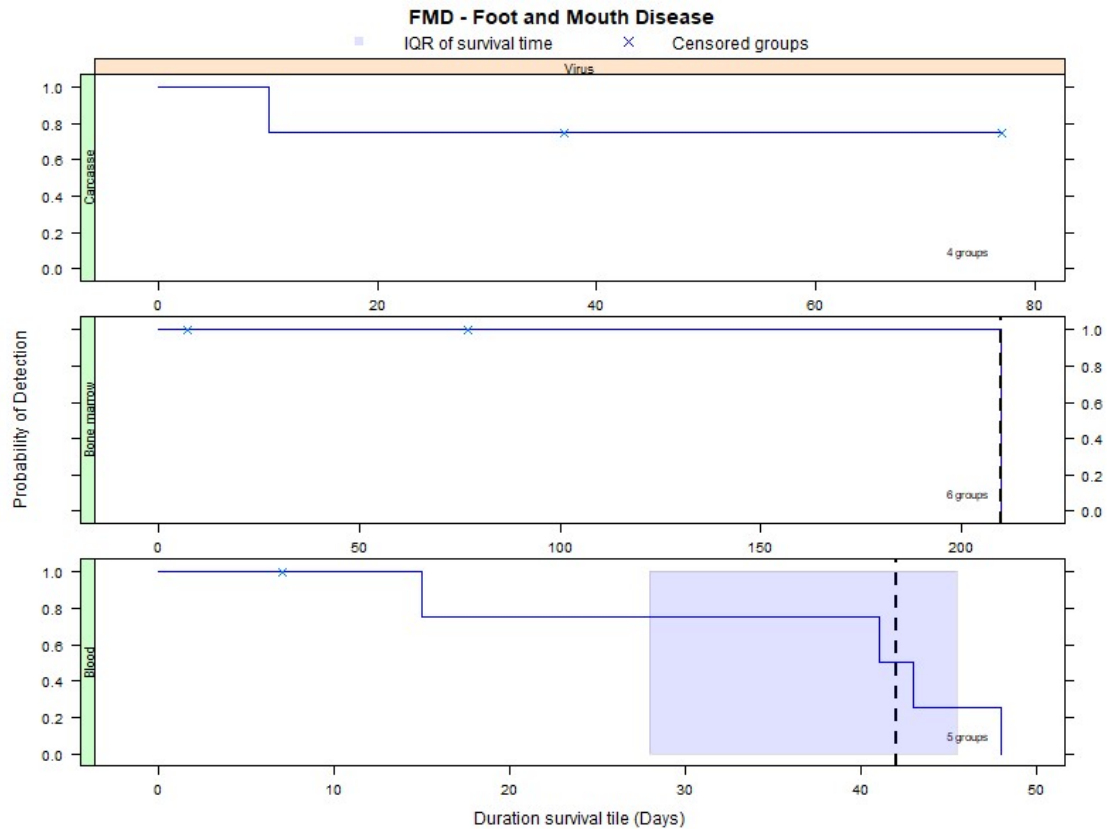

### Meta-analysis – Median FMD virus survival (in days) in different matrices

| matrix     | targetLab | n.rows | median | lower.CI | upper.CI | q1    | q3    |
|------------|-----------|--------|--------|----------|----------|-------|-------|
| Blood      | Virus     | 5      | 42.0   | 15       | NA       | 28.0  | 45.5  |
| one marrow | Virus     | 6      | 210.0  | NA       | NA       | 210.0 | 210.0 |
| Carcasse   | Virus     | 4      | NA     | 10       | NA       | 43.5  | NA    |
| Feed       | Virus     | 10     | 21.0   | 14       | NA       | 14.0  | NA    |
| Lymph node | Virus     | 8      | 57.0   | 48       | NA       | 48.0  | 120.0 |
| Offal      | Virus     | 35     | 18.0   | 11       | NA       | 9.5   | NA    |
| Other      | Virus     | 13     | 5.0    | 3        | NA       | 3.0   | 120.0 |
| Wool       | Virus     | 10     | NA     | NA       | NA       | NA    | NA    |

lower.CI, upper.CI= lower and upper control limit of a 95% confidence interval accounting for censoring (lack of information about true maximum when experiments ended while the agent was still detectable); q1, q3= first and third quartiles (25% and 75% of values); n.rows= number of experiments from which pathogen survival data was available

### Rinderpest

2 publications studying the survival of RPV in various products and materials have been identified by the ELS<sup>4</sup>. These results from half-life studies which documented virus viability decay over time under different temperatures are shown.

<sup>4</sup> <https://animal-diseases.efsa.europa.eu/RPV/#page-3>



### Half-live study plot – virus isolation

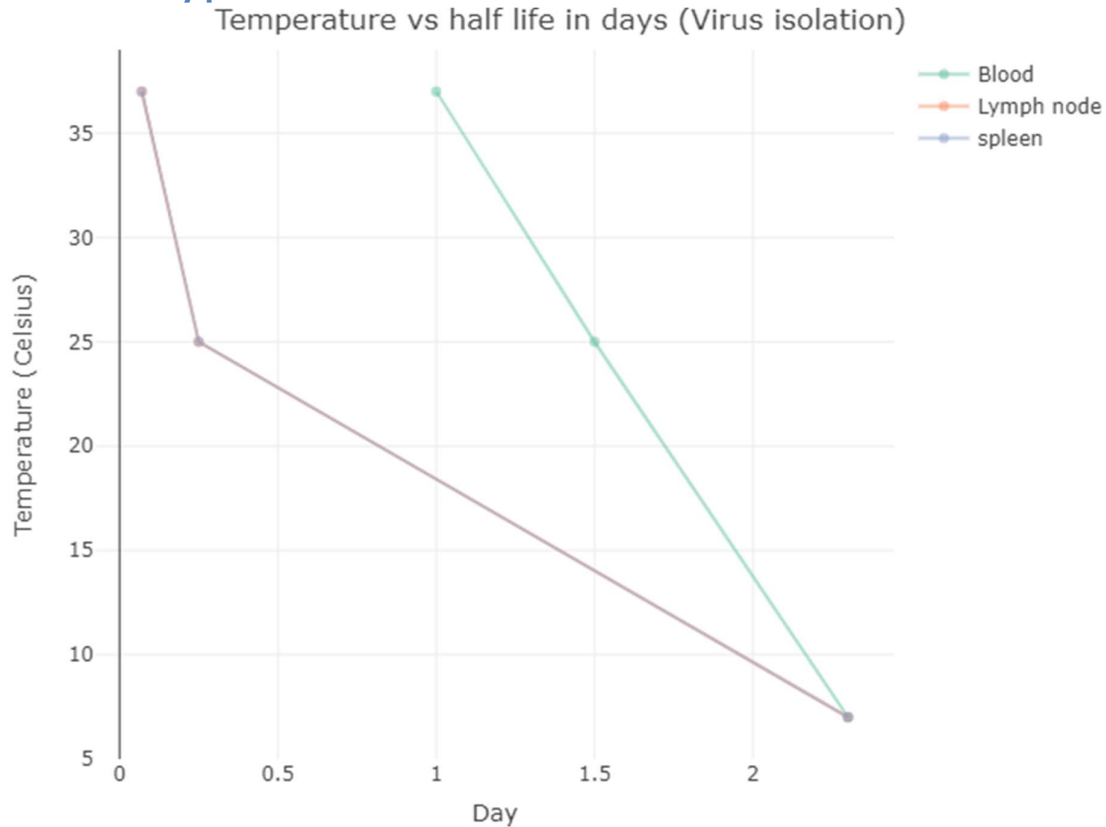

### Meta-analysis – Median RP virus survival (in days) in different matrices

Meta-analysis was not performed for this agent/disease. There was not enough evidence.

### Lumpy Skin Disease

There was not enough evidence for this disease/pathogen<sup>5</sup>.

### Contagious bovine pleuropneumonia

There was not enough evidence for this disease/pathogen<sup>6</sup>.

### Sheep pox and goat pox

There was not enough evidence for this disease/pathogen.<sup>7</sup>

### Peste des petits ruminants

There was not enough evidence for this disease/pathogen.<sup>8</sup>

<sup>5</sup> <https://animal-diseases.efsa.europa.eu/LSDV/#page-3>

<sup>6</sup> <https://animal-diseases.efsa.europa.eu/CBPP/#page-3>

<sup>7</sup> <https://animal-diseases.efsa.europa.eu/SPPV/#page-3>

<sup>8</sup> <https://animal-diseases.efsa.europa.eu/PPRV/#page-3>

## Contagious caprine pleuropneumonia

There was not enough evidence for this disease/pathogen.<sup>9</sup>

## Classical Swine Fever

Six publications studying the survival of CSFV in various products and materials have been identified by the ELS<sup>10</sup>. The findings are presented in a survival plot indicating the maximum number of days the virus was detected by virus isolation in different matrices under different conditions (temperature). Further, results from half-life studies which documented virus viability decay over time under different temperatures are shown.

A meta-analysis of CSFV survival in different matrices was done to account explicitly for the effect of censoring, that is, studies which were interrupted while the agent was still detectable in the matrices investigated. Only studies with temperature between 0 and 30 degrees Celsius (materials not frozen or heated) were eligible, as comparisons among studies with larger temperature variation would not be meaningful. Plots show the parametric confidence intervals for the mean survival time when at least 4 study groups are reported and the interquartile ranges (IQ, Q1-Q3). The exact number for these intervals for each of the matrices reported is shown in a table.

### Survival plot – virus isolation in days after animal infection

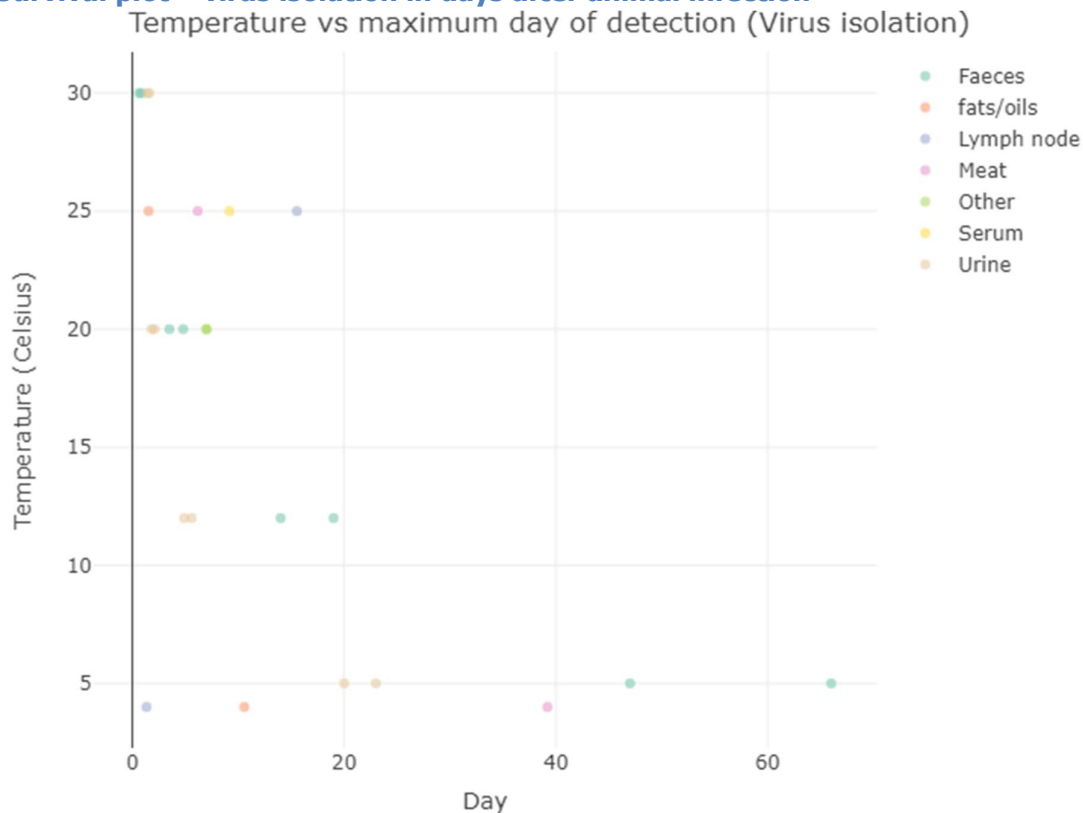

<sup>9</sup> <https://animal-diseases.efsa.europa.eu/CCPP/#page-3>

<sup>10</sup> <https://animal-diseases.efsa.europa.eu/CSFV/#page-3>

### Half-live study plot – virus isolation

Temperature vs half life in days (Virus isolation)

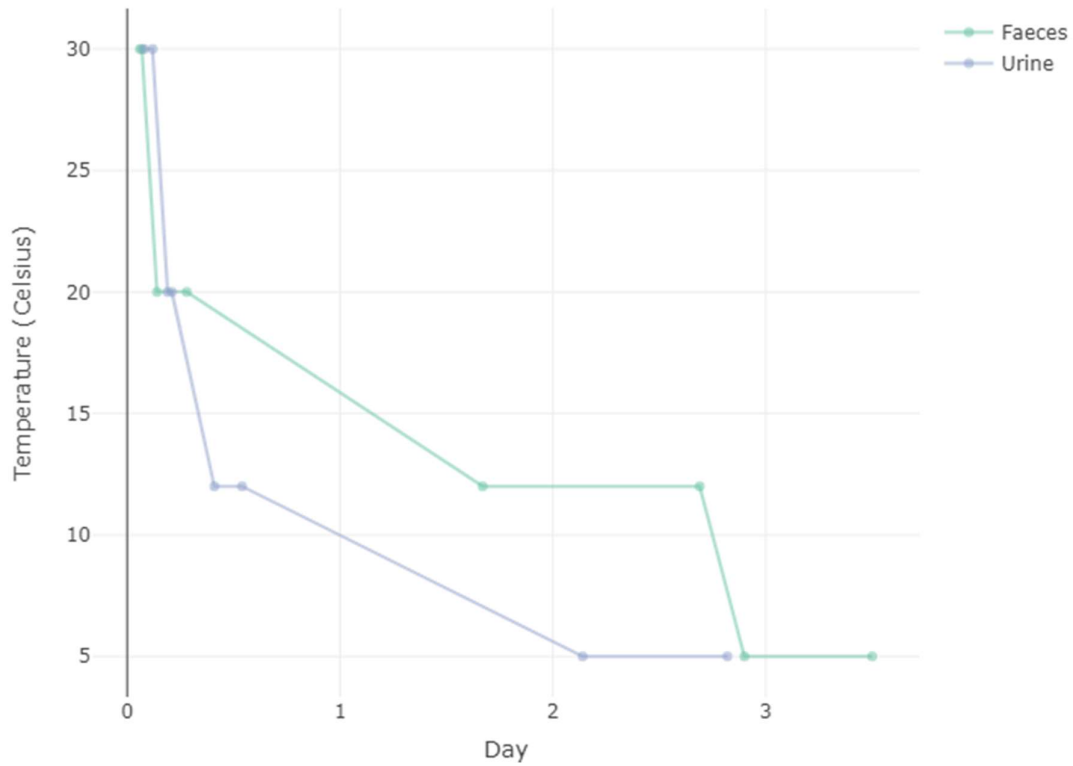

### Meta-analysis - Virus detection (0-30°C) (parametric intervals)

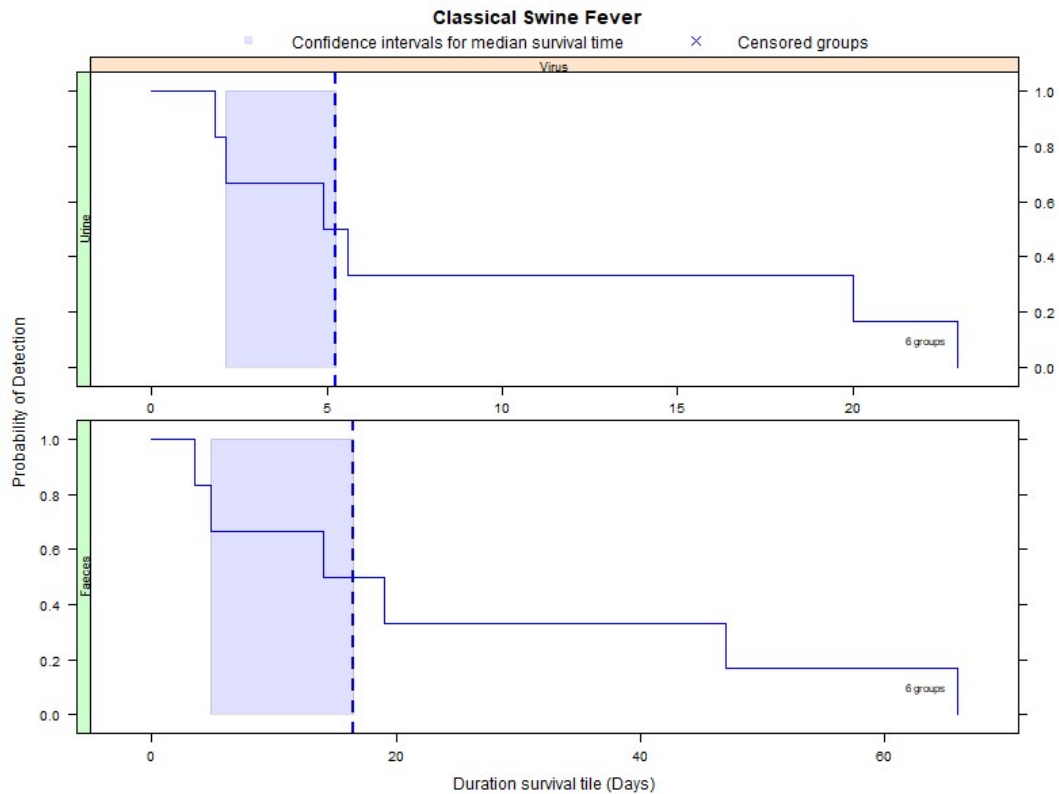

### Meta-analysis - Virus detection (0-30°C) (IQ range)

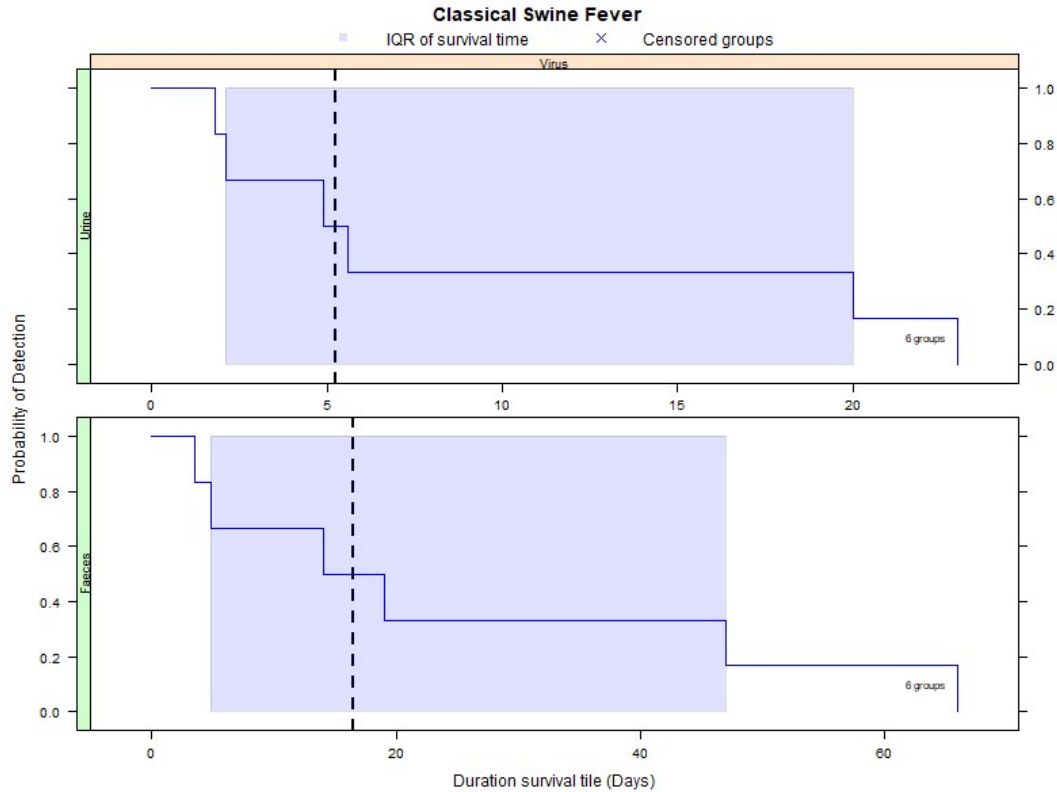

### Meta-analysis – Median CSF virus survival (in days) in different matrices

| matrix | targetLab | n.rows | median | lower.CI | upper.CI | q1  | q3 |
|--------|-----------|--------|--------|----------|----------|-----|----|
| Faeces | Virus     | 6      | 16.5   | 4.8      | NA       | 4.8 | 47 |
| Urine  | Virus     | 6      | 5.2    | 2.1      | NA       | 2.1 | 20 |

lower.CI, upper.CI= lower and upper control limit of a 95% confidence interval accounting for censoring (lack of information about true maximum when experiments ended while the agent was still detectable); q1, q3= first and third quartiles (25% and 75% of values); n.rows= number of experiments from which pathogen survival data was available

### African Swine Fever

22 publications studying the survival of ASFV in various products and materials have been identified by the ELS<sup>11</sup>. The findings are presented in a survival plot indicating the maximum number of days the virus was detected by virus isolation in different matrices under different conditions (temperature). Further, results from half-life studies which documented virus viability decay over time under different temperatures are shown.

A meta-analysis of ASFV survival in different matrices was done to account explicitly for the effect of censoring, that is, studies which were interrupted while the agent was still detectable in the matrices investigated. Only studies with temperature between 0 and 30 degrees Celsius (materials not frozen or heated) were eligible, as comparisons among

<sup>11</sup> <https://animal-diseases.efsa.europa.eu/ASFV/#page-4>

studies with larger temperature variation would not be meaningful. Plots show the parametric confidence intervals for the mean survival time when at least 4 study groups are reported and the interquartile ranges (IQ, Q1-Q3). The exact number for these intervals for each of the matrices reported is shown in a table.

### Survival plot – virus isolation in days after animal infection

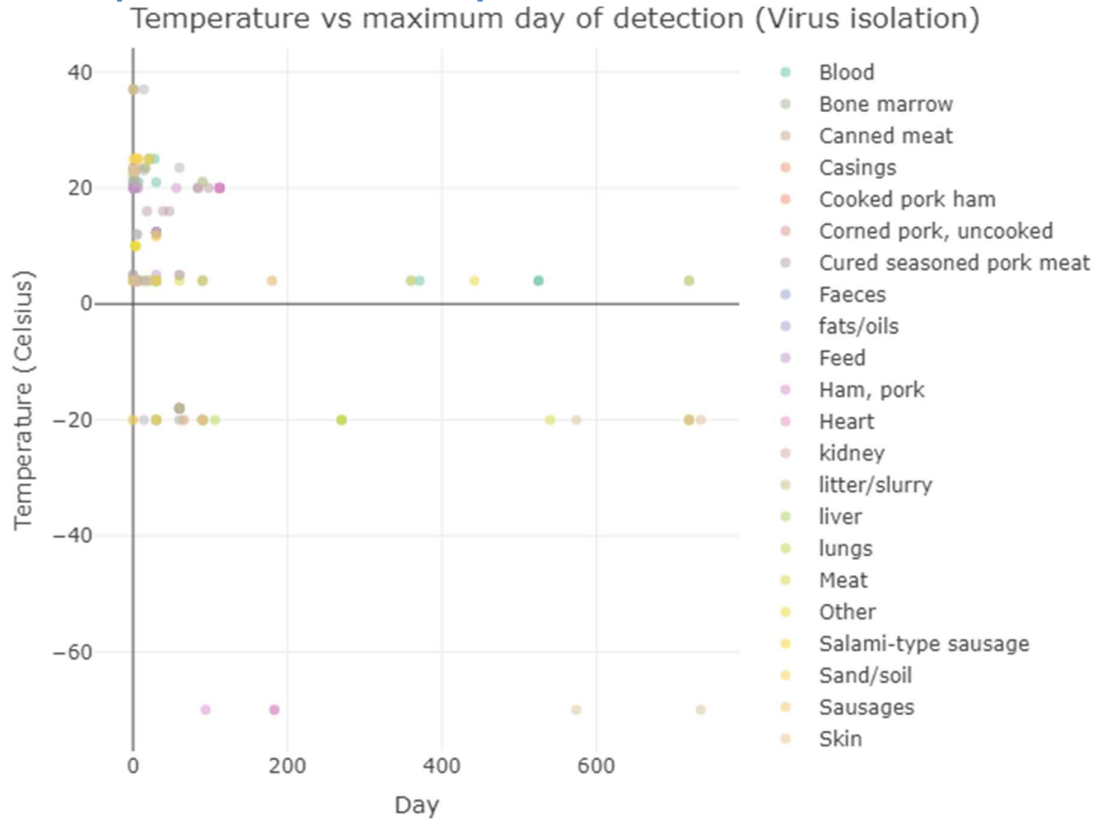

### Half-live study plot – virus isolation

Temperature vs half life in days (Virus isolation)

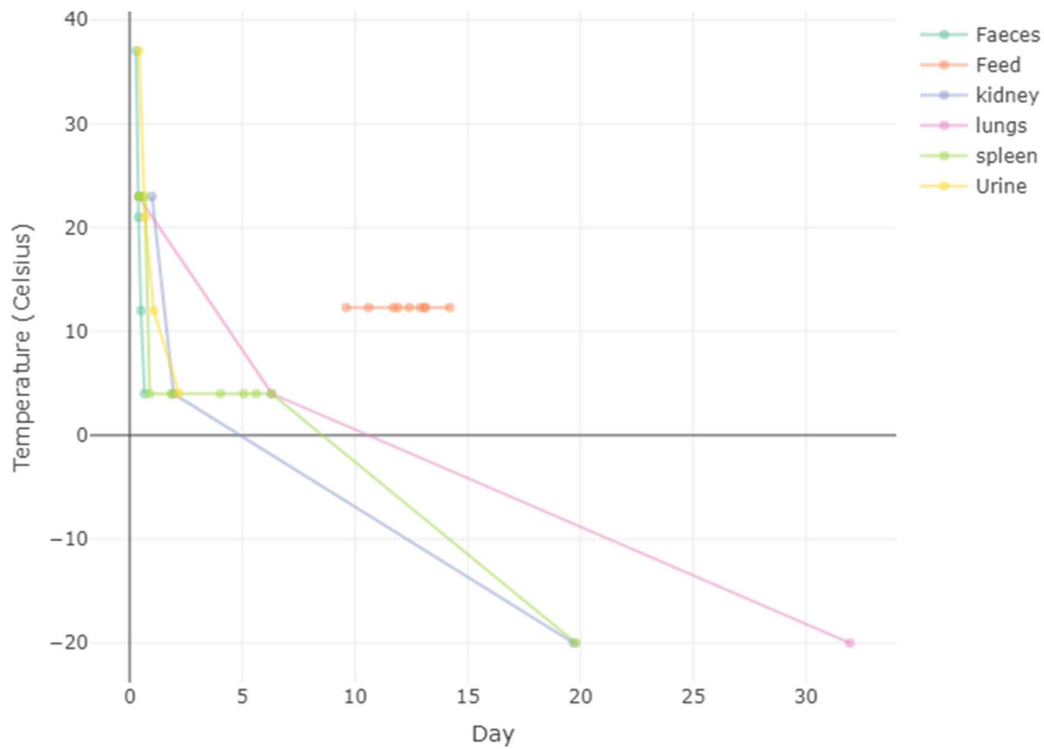

### Meta-analysis - Virus detection (0-30°C) (parametric intervals)

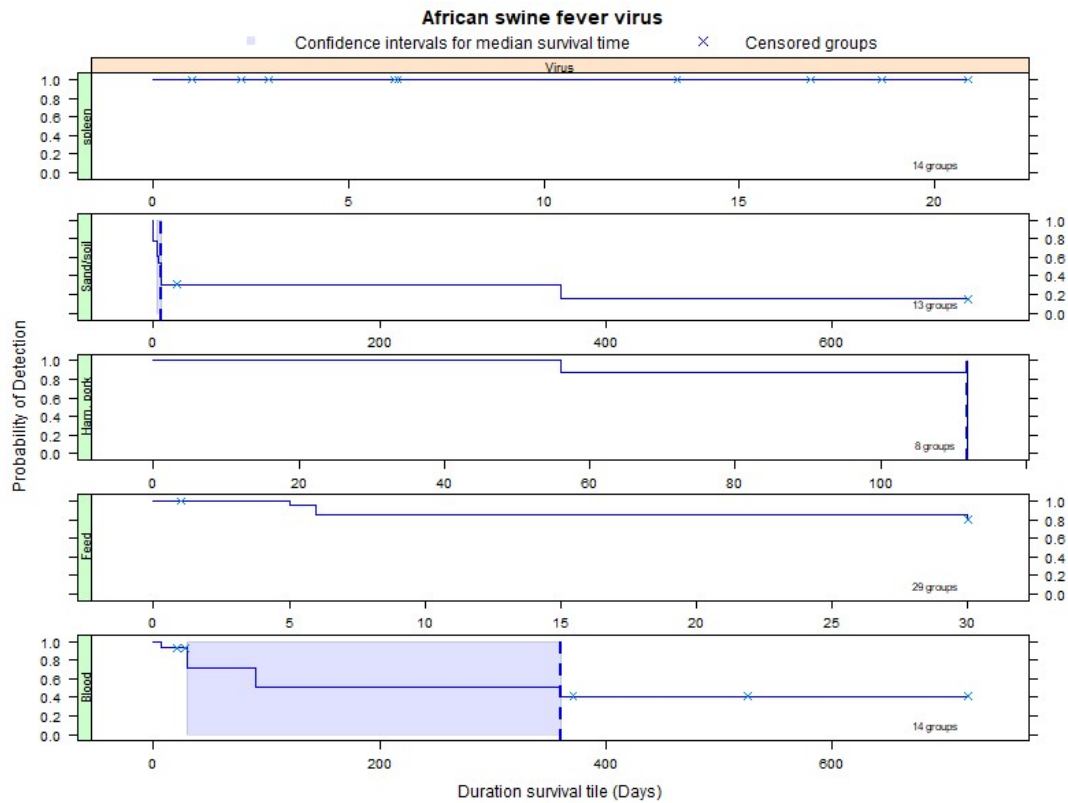

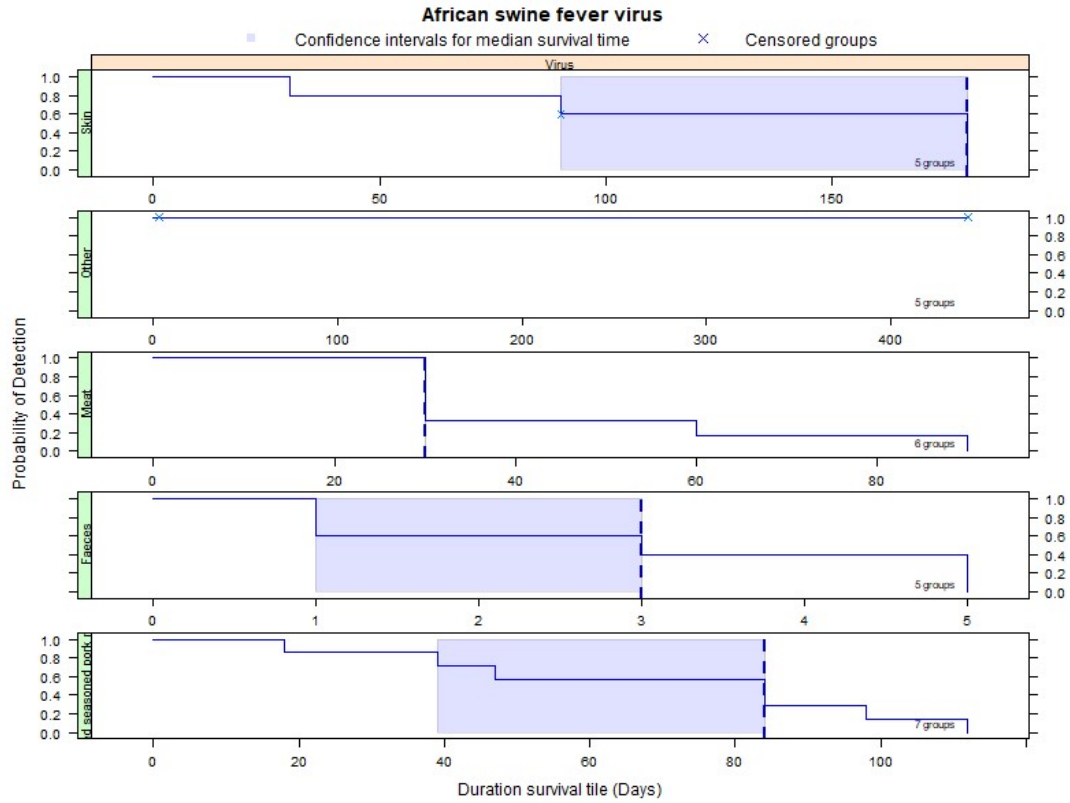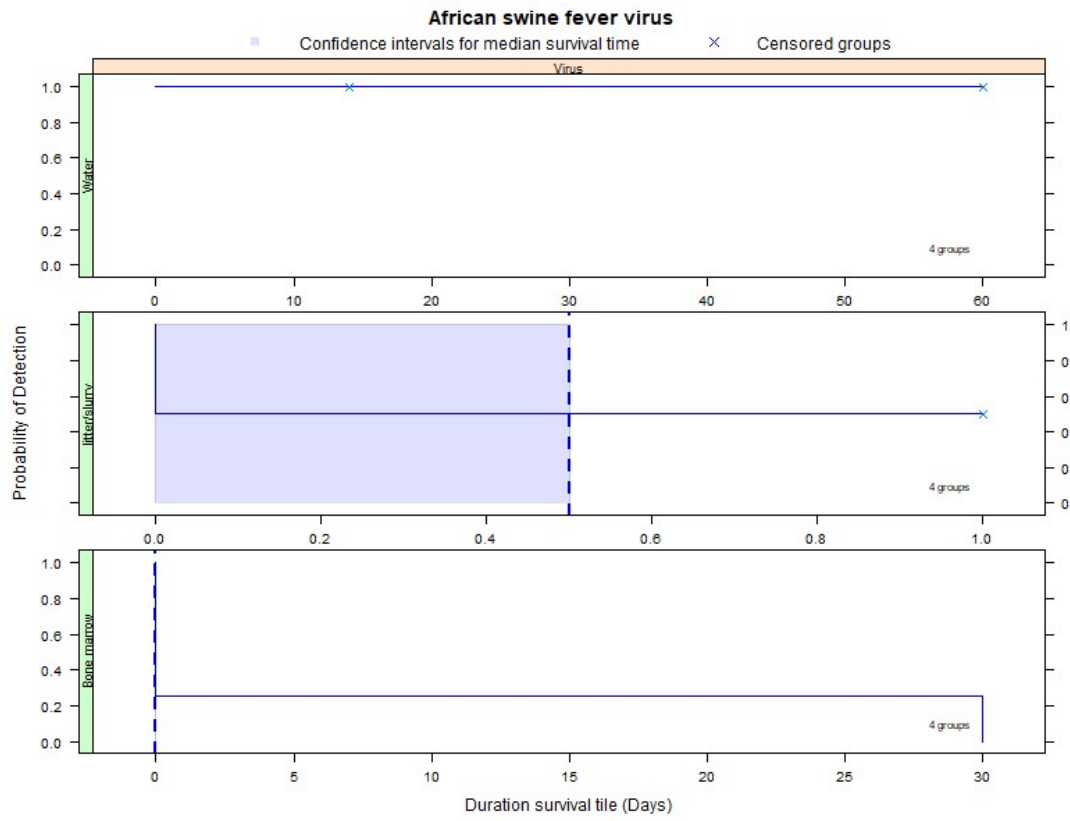

### Meta-analysis - Virus detection (0-30°C) (IQ range)

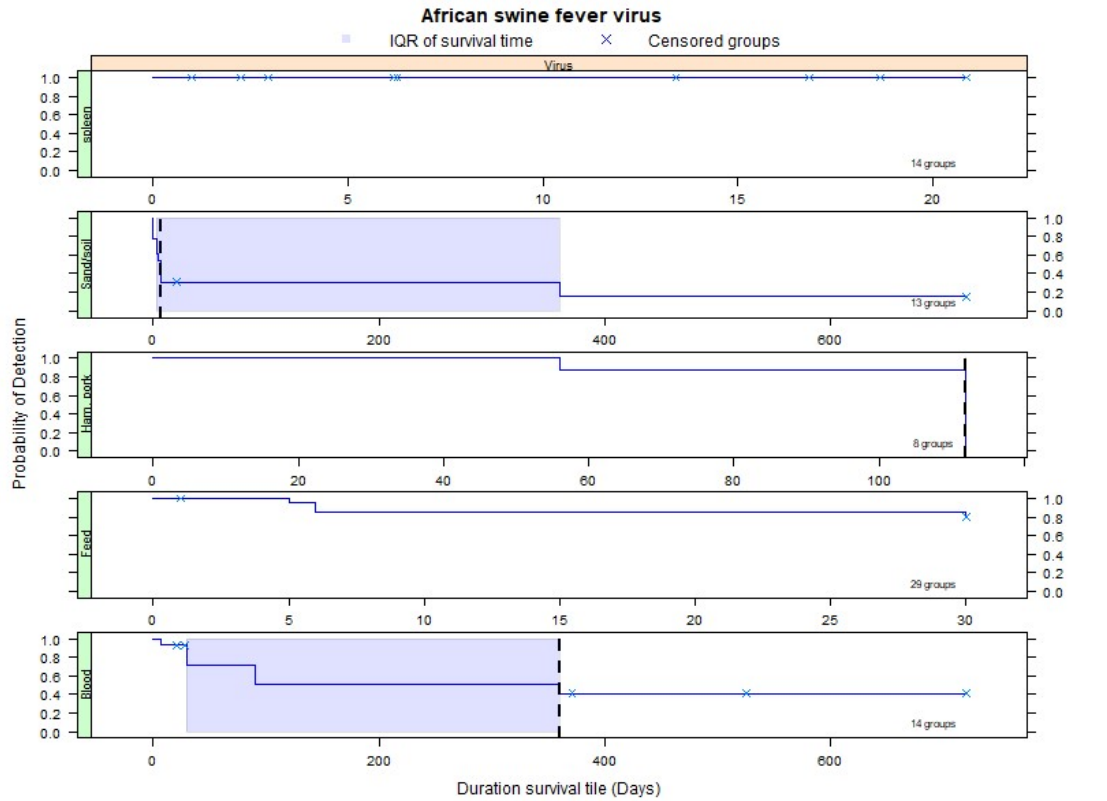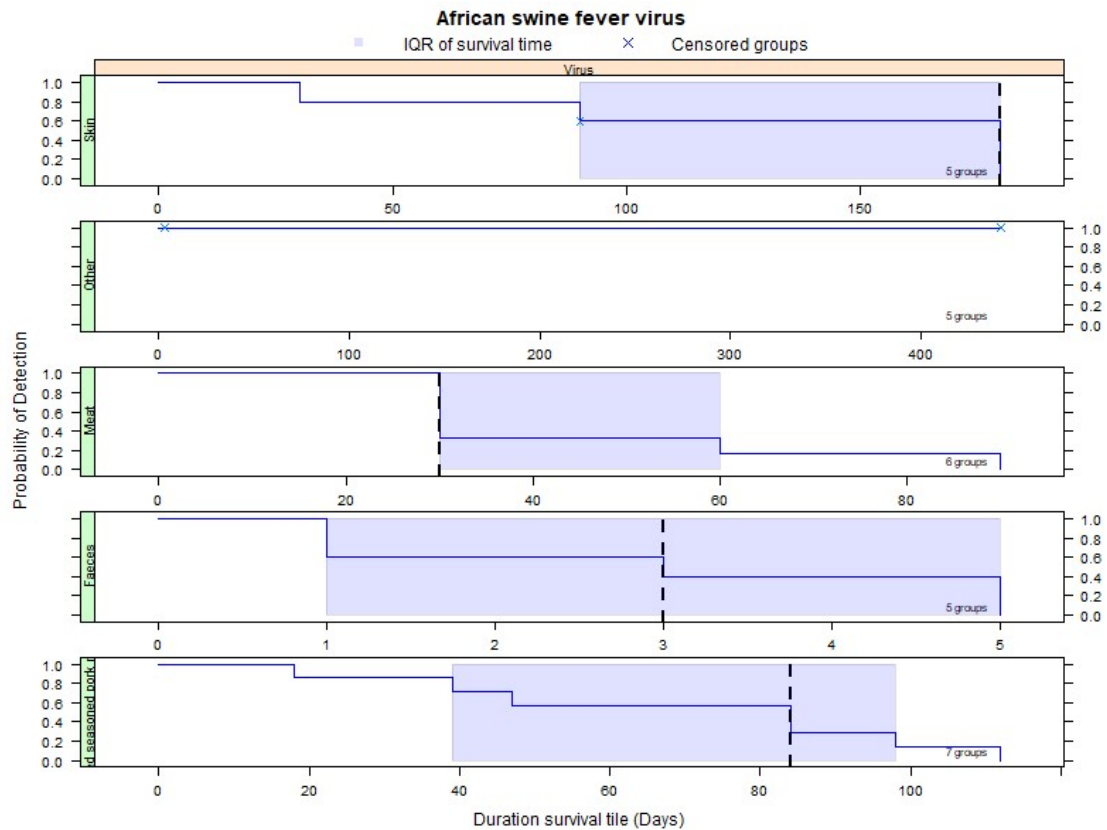



**Meta-analysis – Median ASF virus survival (in days) in different matrices**

| <b>matrix</b>            | <b>targetLab</b> | <b>n.rows</b> | <b>median</b> | <b>lower.CI</b> | <b>upper.CI</b> | <b>q1</b> | <b>q3</b> |
|--------------------------|------------------|---------------|---------------|-----------------|-----------------|-----------|-----------|
| Blood                    | Virus            | 14            | 360.0         | 30              | NA              | 30        | NA        |
| Bone marrow              | Virus            | 4             | 0.0           | 0               | NA              | 0         | 15        |
| Cured seasoned pork meat | Virus            | 7             | 84.0          | 39              | NA              | 39        | 98        |
| Faeces                   | Virus            | 5             | 3.0           | 1               | NA              | 1         | 5         |
| Feed                     | Virus            | 29            | NA            | NA              | NA              | NA        | NA        |
| Ham, pork                | Virus            | 8             | 112.0         | NA              | NA              | 112       | 112       |
| litter/slurry            | Virus            | 4             | 0.5           | 0               | NA              | 0         | NA        |
| Meat                     | Virus            | 6             | 30.0          | 30              | NA              | 30        | 60        |
| Other                    | Virus            | 5             | NA            | NA              | NA              | NA        | NA        |
| Sand/soil                | Virus            | 13            | 7.0           | 3               | NA              | 3         | 360       |
| Skin                     | Virus            | 5             | 180.0         | 90              | NA              | 90        | 180       |
| spleen                   | Virus            | 14            | NA            | NA              | NA              | NA        | NA        |
| Water                    | Virus            | 4             | NA            | NA              | NA              | NA        | NA        |

lower.CI, upper.CI= lower and upper control limit of a 95% confidence interval accounting for censoring (lack of information about true maximum when experiments ended while the agent was still detectable); q1, q3= first and third quartiles (25% and 75% of values); n.rows= number of experiments from which pathogen survival data was available

## African Horse Sickness

One publication studying the survival of AHSV in various products and materials have been identified by the ELS<sup>12</sup>. The findings are presented in a survival plot indicating the maximum number of days the virus was detected by virus isolation in different matrices under different conditions (temperature).

Meta-analysis was not performed for this agent/disease due to lack of evidence. When evidence was available through systematic literature review for a minimum of 4 data points per animal matrix, this evidence was subjected to meta-analysis. In such cases, Kaplan-Meier curves would be fit to the data, in order to estimate confidence intervals (CI) and interquartile ranges (IQ) for the duration of the pathogen survival explicitly taking into account the data censoring issue (lack of information about true maximum when experiments ended while the agent was still detectable). There was not enough evidence for this disease/pathogen.

### Survival plot – virus isolation in days after animal infection

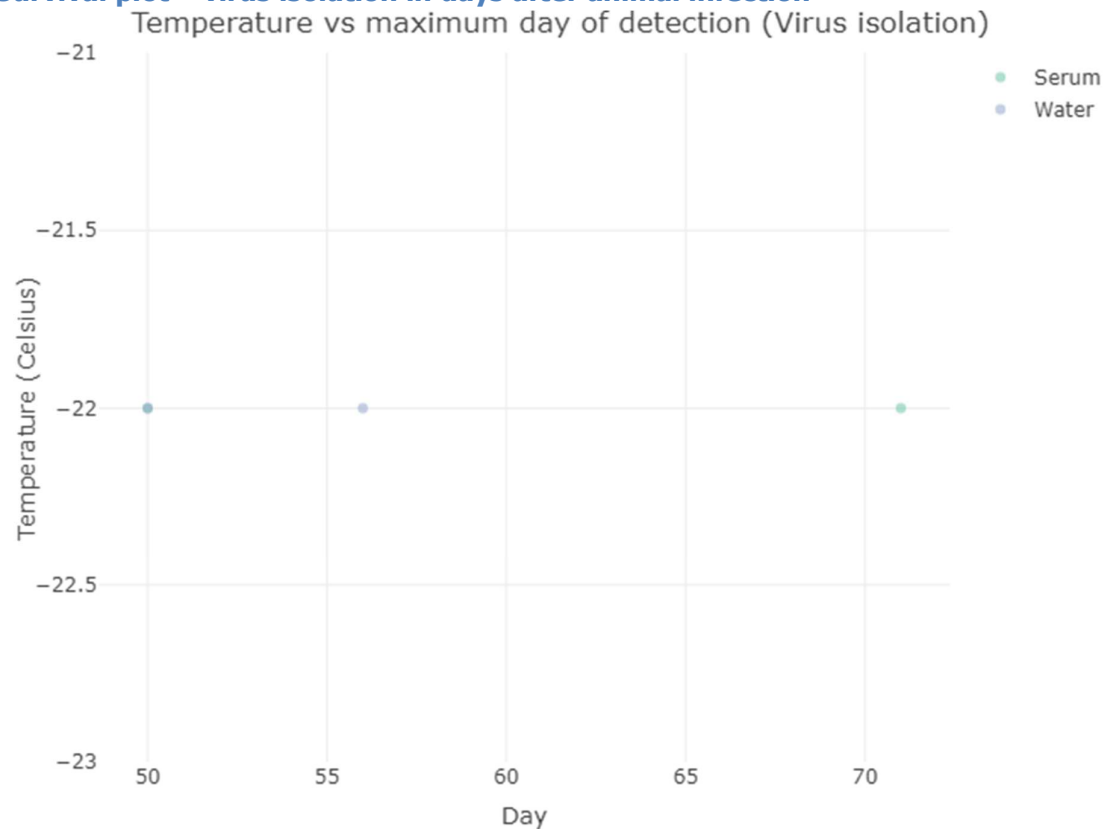

## Highly Pathogenic Avian Influenza

16 publications studying the survival of HPAIV in various products and materials have been identified by the ELS<sup>13</sup>. The findings are presented in a survival plot indicating the maximum number of days the virus was detected by virus isolation in different matrices under different conditions (temperature).

<sup>12</sup> <https://animal-diseases.efsa.europa.eu/AHSV/#page-4>

<sup>13</sup> <https://animal-diseases.efsa.europa.eu/HPAI/#page-3>

A meta-analysis of HPAIV survival in different matrices was done to account explicitly for the effect of censoring, that is, studies which were interrupted while the agent was still detectable in the matrices investigated. Only studies with temperature between 0 and 30 degrees Celsius (materials not frozen or heated) were eligible, as comparisons among studies with larger temperature variation would not be meaningful. Plots show the parametric confidence intervals for the mean survival time when at least 4 study groups are reported and the interquartile ranges (IQ, Q1-Q3). The exact number for these intervals for each of the matrices reported is shown in a table.

**Survival plot – virus isolation in days after animal infection**

Temperature vs maximum day of detection (Virus isolation)

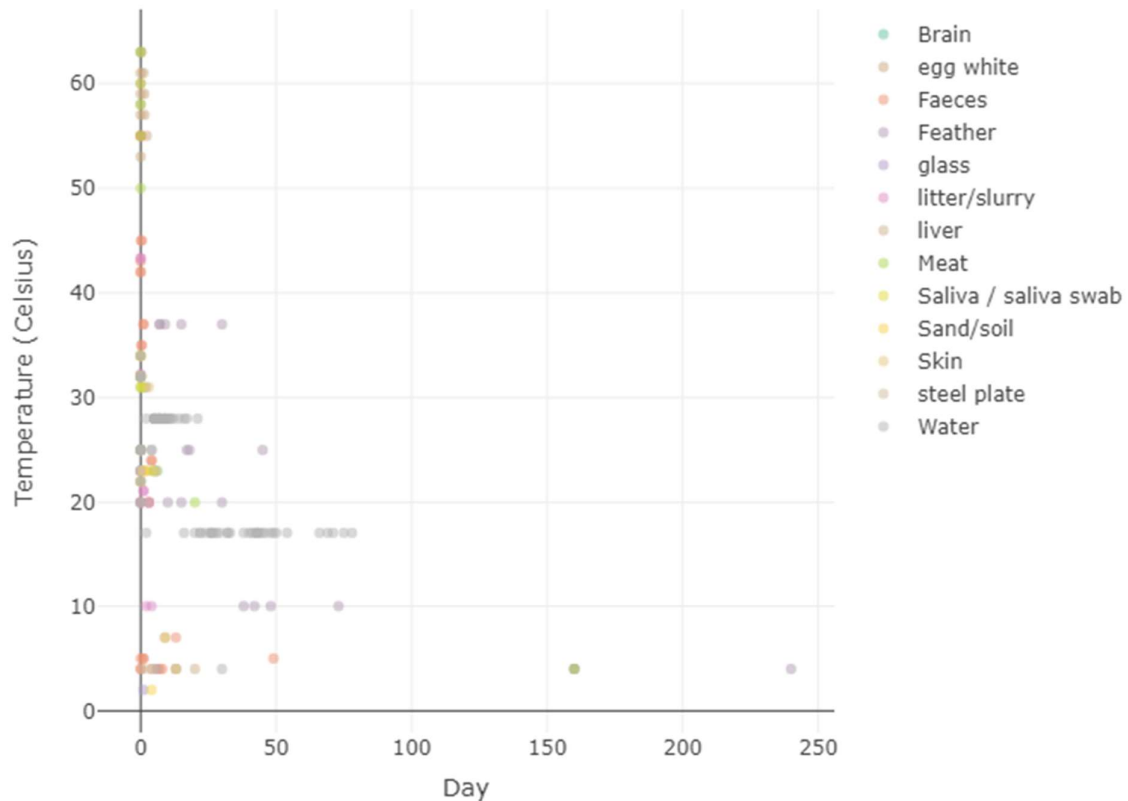

### Meta-analysis - Virus detection (0-30°C) (parametric intervals)

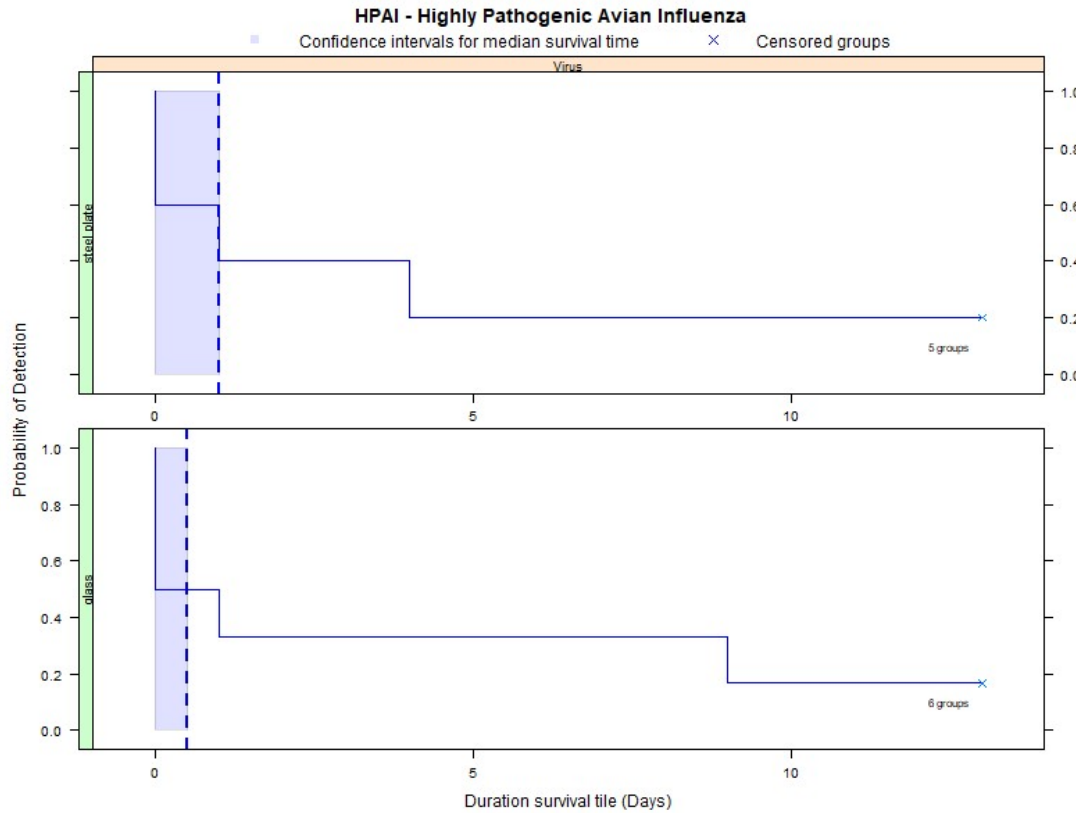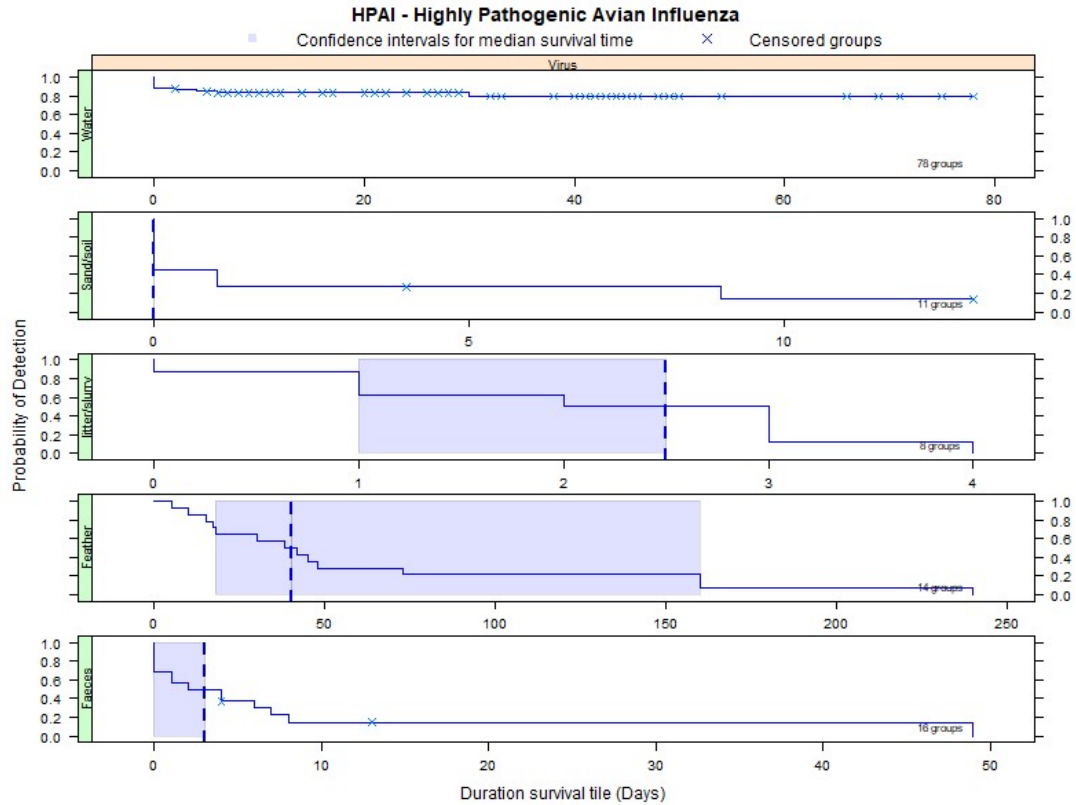

### Meta-analysis - Virus detection (0-30°C) (IQ range)

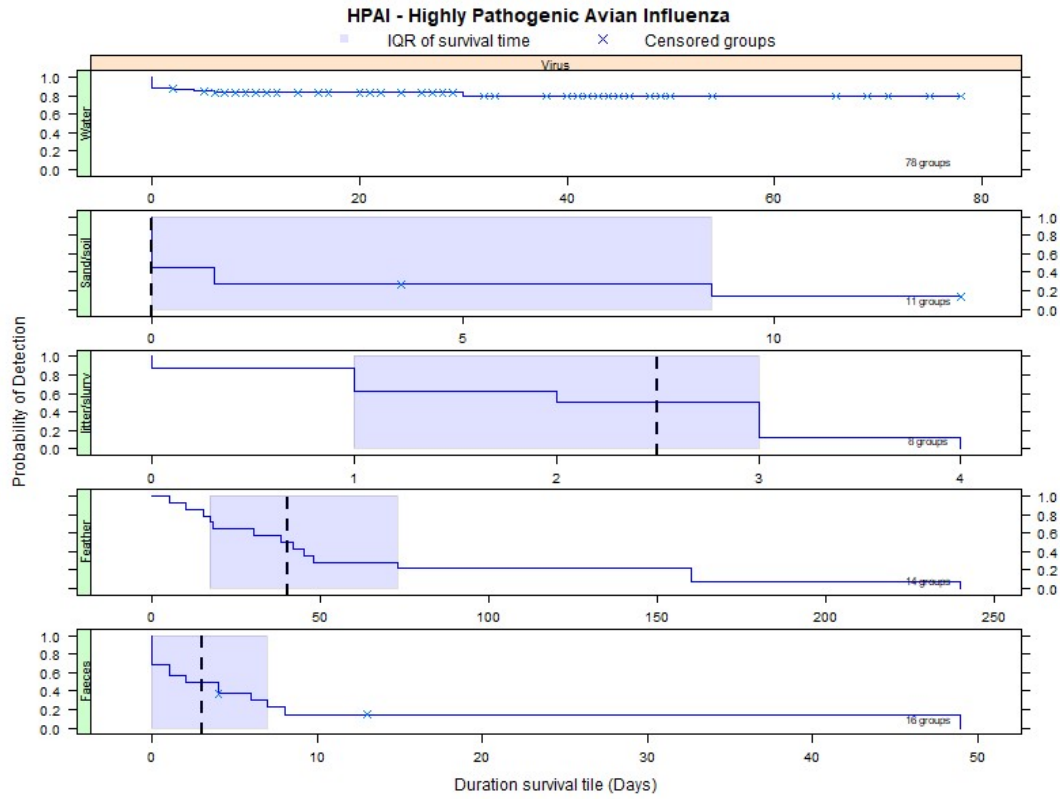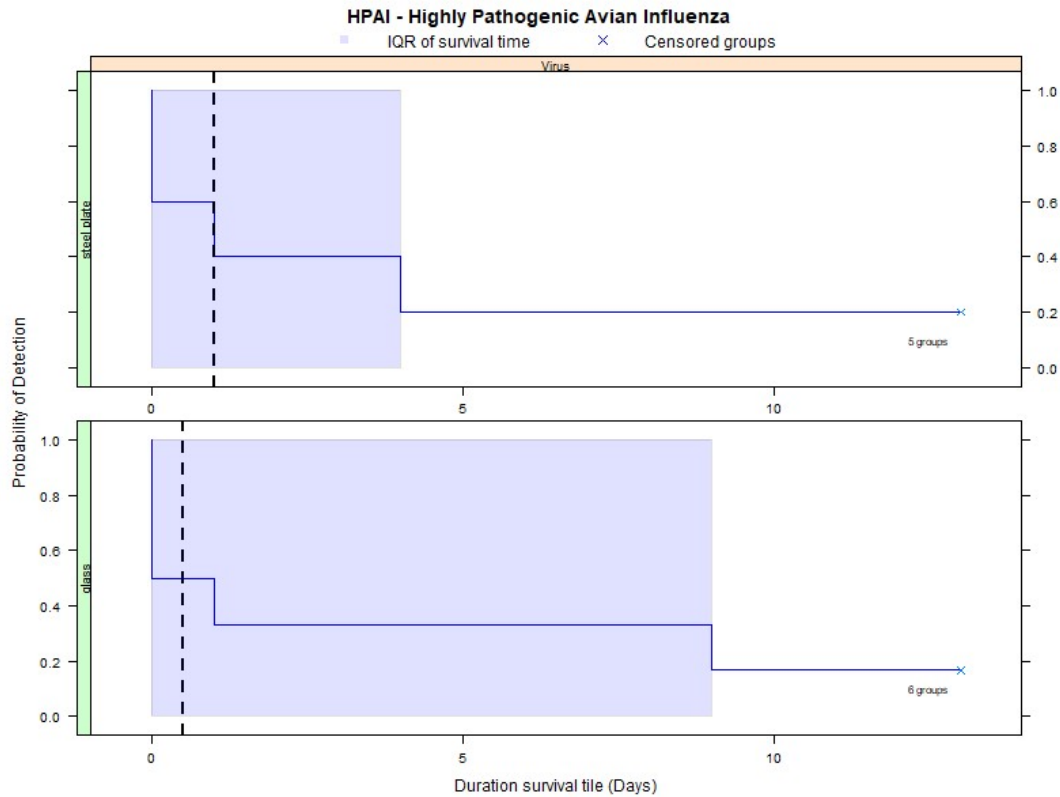

### Meta-analysis – Median HPAI virus survival (in days) in different matrices

| matrix            | targetLab | n.rows | median | lower.CI | upper.CI | q1 | q3 |
|-------------------|-----------|--------|--------|----------|----------|----|----|
| Faeces            | Virus     | 16     | 3.0    | 0        | NA       | 0  | 7  |
| Feather           | Virus     | 14     | 40.0   | 18       | 160      | 17 | 73 |
| glass             | Virus     | 6      | 0.5    | 0        | NA       | 0  | 9  |
| litter/<br>slurry | Virus     | 8      | 2.5    | 1        | NA       | 1  | 3  |
| Sand/ soil        | Virus     | 11     | 0.0    | 0        | NA       | 0  | 9  |
| steel plate       | Virus     | 5      | 1.0    | 0        | NA       | 0  | 4  |
| Water             | Virus     | 78     | NA     | NA       | NA       | NA | NA |

lower.CI, upper.CI= lower and upper control limit of a 95% confidence interval accounting for censoring (lack of information about true maximum when experiments ended while the agent was still detectable); q1, q3= first and third quartiles (25% and 75% of values); n.rows= number of experiments from which pathogen survival data was available

### Newcastle Disease

Seven publications studying the survival of NDV in various products and materials have been identified by the ELS<sup>14</sup>. The findings are presented in a survival plot indicating the maximum number of days the virus was detected by virus isolation in different matrices under different conditions (temperature).

A meta-analysis of NDV survival in different matrices was done to account explicitly for the effect of censoring, that is, studies which were interrupted while the agent was still detectable in the matrices investigated. Only studies with temperature between 0 and 30 degrees Celsius (materials not frozen or heated) were eligible, as comparisons among studies with larger temperature variation would not be meaningful. Plots show the

<sup>14</sup> <https://animal-diseases.efsa.europa.eu/NDV/#page-3>

parametric confidence intervals for the mean survival time when at least 4 study groups are reported and the interquartile ranges (IQ, Q1-Q3). The exact number for these intervals for each of the matrices reported is shown in a table.

### Survival plot – virus isolation in days after animal infection

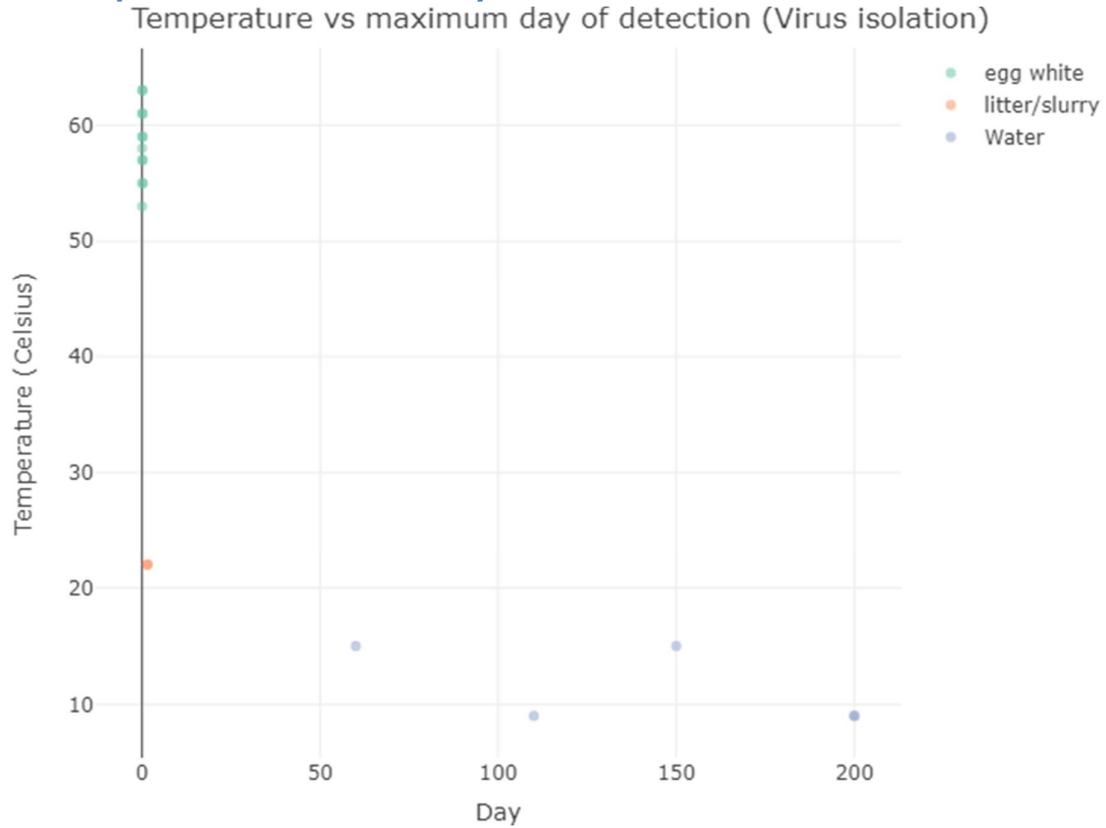

### Meta-analysis - Virus detection (0-30°C) (parametric intervals)

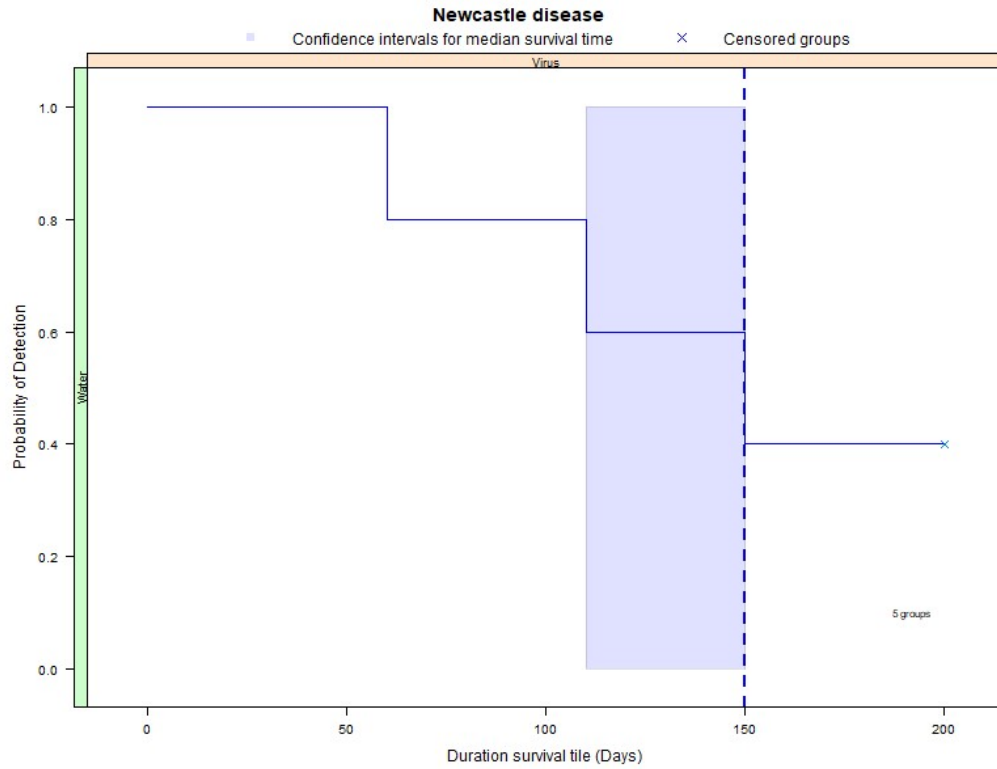

### Meta-analysis - Virus detection (0-30°C) (IQ range)

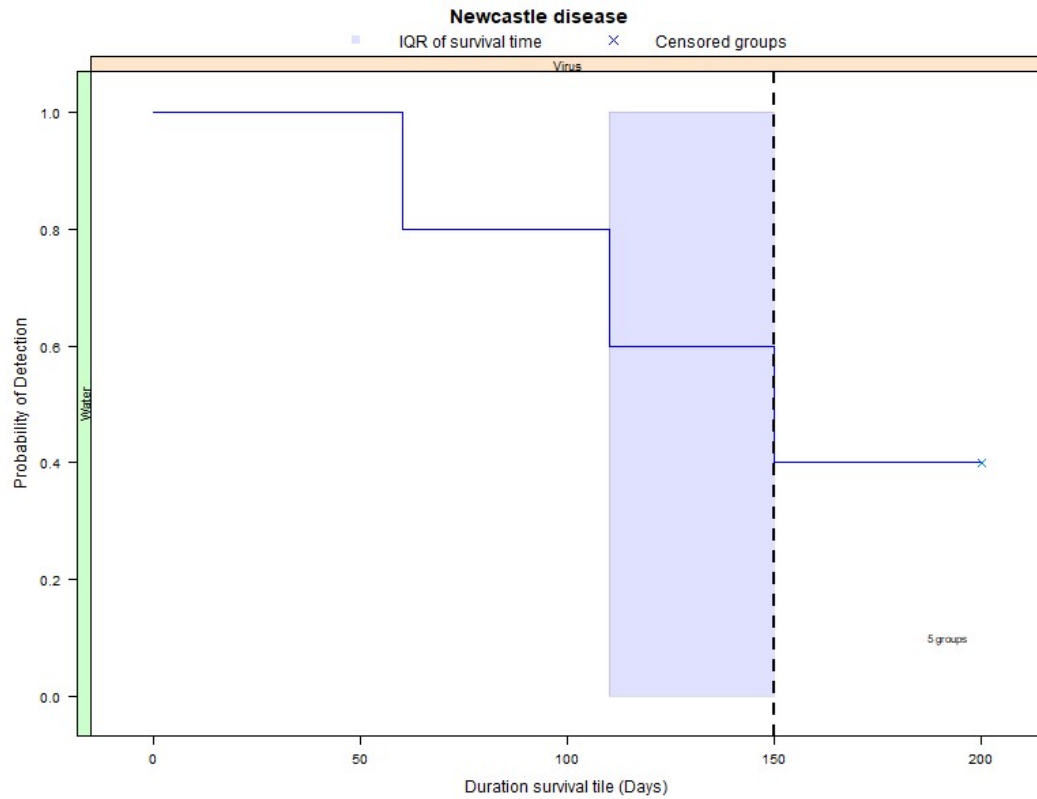



## Meta-analysis – Median NDV survival (in days) in different matrices

| matrix | targetLab | n.rows | median | lower.CI | upper.CI | q1  | q3 |
|--------|-----------|--------|--------|----------|----------|-----|----|
| Water  | Virus     | 5      | 150    | 110      | NA       | 110 | NA |

lower.CI, upper.CI= lower and upper control limit of a 95% confidence interval accounting for censoring (lack of information about true maximum when experiments ended while the agent was still detectable); q1, q3= first and third quartiles (25% and 75% of values); n.rows= number of experiments from which pathogen survival data was available

## 4 References

Aly, S.A., Gaber, A.S. (2007). Inactivation of foot and mouth disease virus in milk and milk products. *Milchwissenschaft*, 62(1), 3

Bauer, K., Eissner, G. (1972). Persistence and disinfection of foot-and-mouth disease (FMD) virus in liquid dung from manure washings. *Berliner und Munchener Tierarztliche Wochenschrift*, 85(19), 367

Blackwell, J.H. (1976). Survival of Foot-and-Mouth Disease Virus in Cheese. *Journal of Dairy Science*, 59(9), 1574

Blacksell, S.D., Khounsy, S., Westbury, H.A. (2004). The effect of sample degradation and RNA stabilization on classical swine fever virus RT-PCR and ELISA methods. *Journal of Virological Methods*, 118(1), 33

Blackwell, J.H. (1978). Persistence of foot-and-mouth disease virus in butter and butter oil. *Journal of Dairy Research*, 45(2), 283

Böhm, H.O., Krebs, H. (1974). Detection of foot and mouth disease virus in organs of infected sheep. *Berliner und Munchener Tierarztliche Wochenschrift*, 87(21), 410

Böhm, H.O. (1984). The effect of aerobic-thermophilic treatment on pig liquid manure containing different viruses. *Agricultural Wastes*, 10(1), 47

Brooksby, J.B. (1948). The survival of the virus of foot-and-mouth disease in blood at 37 C. *British journal of experimental pathology*, 29(1), 10

Brown, J., Stallknecht, D., Lebarbenchon, C., Swayne, D. (2014). Survivability of Eurasian H5N1 Highly Pathogenic Avian Influenza Viruses in Water Varies between Strains. *Avian Diseases*, 58(3), 453

Busquets, N., Xavier Abad, F., Alba, A., Dolz, R., Allepuz, A., Rivas, R., Ramis, A., Darji, A., Majó, N. (2010). Persistence of highly pathogenic avian influenza virus (H7N1) in infected chickens: Feather as a suitable sample for diagnosis. *Journal of General Virology*, 91(9), 2307

- Carlson, J., Fischer, M., Zani, L., Eschbaumer, M., Fuchs, W., Mettenleiter, T., Beer, M., Blome, S. (2020). Stability of African swine fever virus in soil and options to mitigate the potential transmission risk. *Pathogens*, 9(11), 1
- Chmielewski, R.A., Beck, J.R., Swayne, D.E. (2011). Thermal inactivation of avian influenza virus and newcastle disease virus in a fat-free egg product. *Journal of Food Protection*, 74(7), 1161
- Cottral, G.E. (1969). Persistence of foot-and-mouth disease virus in animals, their products and the environment. *Bulletin de l'Office International des Epizooties*, 70(3), 549
- Cottral, G.E., Cox, B.F., Baldwin, D.E. (1960). The survival of foot-and-mouth disease virus in cured and uncured meat. *American journal of veterinary research*, 21, 288-297
- Cowan, L., Haines, F.J., Everett, H.E., Crudgington, B., Johns, H.L., Clifford, D., Drew, T.W., Crooke, H.R. (2015). Factors affecting the infectivity of tissues from pigs with classical swine fever: Thermal inactivation rates and oral infectious dose. *Veterinary Microbiology*, 176(1-2), 1
- Davies K, L.C. Goatley, C. Guinat, C.L. Netherton, S. Gubbins, L.K. Dixon, A.L. Reis (2017). Survival of African Swine Fever Virus in Excretions from Pigs Experimentally Infected with the Georgia 2007/1 Isolate. *Transboundary and Emerging Diseases*, 64(2), 425
- De Carvalho Ferreira H.C., E. Weesendorp, S. Quak, J.A. Stegeman, W.L.A. Loeffen (2014). Suitability of faeces and tissue samples as a basis for non-invasive sampling for African swine fever in wild boar. *Veterinary Microbiology*, 172(3-4), 449
- Dekker, A. (1998). Inactivation of foot-and-mouth disease virus by heat, formaldehyde, ethylene oxide and  $\gamma$  radiation. *Veterinary Record*, 143(6), 168
- Donaldson, A.I. (1972). The influence of relative humidity on the aerosol stability of different strains of foot-and-mouth disease virus suspended in saliva. *The Journal of general virology*, 15(1), 25
- Elving, J., Emmoth, E., Albihn, A., Vinnerås, B., Ottosona, J. (2012). Composting for avian influenza virus elimination. *Applied and Environmental Microbiology*, 78(9), 3280
- Figueroa, A., Derksen, T., Biswas, S., Nazmi, A., Rejmanek, D., Crossley, B., Pandey, P., Gallardo, R.A. (2021). Persistence of low and highly pathogenic avian influenza virus in reused poultry litter, effects of litter amendment use, and composting temperatures. *Journal of Applied Poultry Research*, 30(1), #Pages#
- Fischer, M., Hühr, J., Blome, S., Conraths, F.J., Probst, C. (2020). Stability of African swine fever virus in carcasses of domestic pigs and wild boar experimentally infected with the ASFV "Estonia 2014" isolate. *Viruses*, 12(10)
- Fischer, M., Pikalo, J., Beer, M., Blome, S. (2021). Stability of African swine fever virus on spiked spray-dried porcine plasma. *Transboundary and Emerging Diseases*, 68(5), 2806-2811
- Gailiunas, P., Cottral, G.E., Scott, F.W. (1969). Survival of foot-and-mouth disease virus on meat packaging materials. *Proceedings, annual meeting of the United States Animal Health Association*, 73, 425-436

- Gierløff, B.C.H., Friis Jakobsen, K. (1961). On the Survival of Foot and Mouth Disease Virus in Frozen Bovine Semen. *Acta Veterinaria Scandinavica*, 2(1), 210
- Gilbert, J.P., Wooley, R.E., Shotts Jr., E.B., Dickens, J.A. (1983). Viricidal effects of Lactobacillus and yeast fermentation. *Applied and Environmental Microbiology*, 46(2), 452
- Guan, J., Chan, M., Grenier, C., Brooks, B.W., Spencer, J.L., Kranendonk, C., Copps, J., Clavijo, A. (2010). Degradation of foot-and-mouth disease virus during composting of infected pig carcasses. *Canadian Journal of Veterinary Research*, 74(1), 40
- Hartwig, H., Gothe, E.D. (1958). Untersuchungen an aus- und inländischem Schlachtgeflügel auf Newcastle-Virus unter Berücksichtigung der Überlebensdauer des Virus. *Zentralblatt für Veterinärmedizin*, 5(9), 821
- Horm, S.V., Deboosere, N., Gutiérrez, R.A., Vialette, M., Buchy, P. (2011). Direct detection of highly pathogenic avian influenza A/H5N1 virus from mud specimens. *Journal of Virological Methods*, 176(1-2), 69
- Horm, V.S., Gutiérrez, R.A., Nicholls, J.M., Buchy, P. (2012). Highly pathogenic influenza a(h5n1) virus survival in complex artificial aquatic biotopes. *PLoS ONE*, 7(4)
- Ide, P.R. (1979). The sensitivity of some avian viruses to formaldehyde fumigation. *Canadian Journal of Comparative Medicine*, 43(2), 211
- Isbarn, S., Buckow, R., Himmelreich, A., Lehmacher, A., Heinz, V. (2007). Inactivation of avian influenza virus by heat and high hydrostatic pressure. *Journal of Food Protection*, 70(3), 667
- Jackman, J. A., Hakobyan, A., Zakaryan, H., Elrod, C. C. (2020). Inhibition of African swine fever virus in liquid and feed by medium-chain fatty acids and glycerol monolaurate. *Journal of Animal Science and Biotechnology*, 11(1), #Pages#
- Karunakaran, A.C., Murugkar, H.V., Kumar, M., Nagarajan, S., Tosh, C., Pathak, A., Mekhemadhom Rajendrakumar, A., Agarwal, R.K. (2019). Survivability of highly pathogenic avian influenza virus (H5N1) in naturally preened duck feathers at different temperatures. *Transboundary and Emerging Diseases*, 66(3), 1306
- Kurmi, B., Murugkar, H.V., Nagarajan, S., Tosh, C., Dubey, S.C., Kumar, M. (2013). Survivability of highly pathogenic avian influenza H5N1 virus in poultry faeces at different temperatures. *Indian Journal of Virology*, 24(2), 272
- Kristensen, T., Belsham, G.J., Tjørnehøj, K. (2021). Heat inactivation of foot-and-mouth disease virus, swine vesicular disease virus and classical swine fever virus when air-dried on plastic and glass surfaces. *Biosafety and Health*, 3(4), 217
- Lasta, J., Blackwell, J. H., Sadir, A., Gallinger, M., Marcoveccio, F., Zamorano, M., Luddenand, B., Rodriguez, R. (1992). Combined Treatments of Heat, Irradiation, and pH Effects on Infectivity of Foot-and-Mouth Disease Virus in Bovine Tissues. *Journal of Food Science*, 57(1), 36-39

- Madhanmohan, M., Yuvaraj, S., Manikumar, K., Kumar, R., Nagendrakumar, S.B., Rana, S.K., Srinivasan, V.A. (2016). Evaluation of the Flinders Technology Associates Cards for Storage and Temperature Challenges in Field Conditions for Foot-and-Mouth Disease Virus Surveillance. *Transboundary and Emerging Diseases*, 63(6), 675
- Mahnel, H. (1979). Variations in resistance of viruses from different groups to chemico-physical decontamination methods. *Infection*, 7(5), 240
- Mahnel, H., Ottis, K., Herlyn, M. (1977). Stability in drinking and surface water of nine virus species from different genera. *Zentralblatt für Bakteriologie. Hygiene. Krankenhaushygiene Betriebs hygiene Preventive Medizin - Abt. 1 Orig. B*, 164(1-2), 64
- Mazur-Panasiuk, N., Wozniakowski, G. (2020). Natural inactivation of African swine fever virus in tissues: Influence of temperature and environmental conditions on virus survival. *Veterinary Microbiology*, 242.
- McColl, K., Westbury, H., Kitching, R., Lewis, V. (1995). The persistence of foot-and-mouth disease virus on wool. *Australian Veterinary Journal*, 72(8), 286
- McKercher P.D., R.J. Yedloutschnig, J.J. Callis, R. Murphy, G.F. Panina, A. Civardi, M. Bugnetti, E. Foni, A. Laddomada, C. Scarano, F. Scatozza (1987). Survival of Viruses in "Prosciutto di Parma" (Parma Ham). *Canadian Institute of Food Science and Technology Journal*, 20, 4, 267-272
- McKercher PD, W R Hess, F Hamdy, 1978. Residual viruses in pork products. *Applied and Environmental Microbiology*, 35(1), 142
- Mebus, C.A., House, C., Gonzalvo, F.R., Pineda, J.M., Tapiador, J., Pire, J.J., Bergada, J., Yedloutschnig, R.J., Sahu, S., Becerra, V., Sanchez-Vizcaino, J.M. (1993). Survival of foot-and-mouth disease, African swine fever, and hog cholera viruses in Spanish serrano cured hams and iberian cured hams, shoulders and loins. *Food Microbiology*, 10(2), 133
- Niederwerder, M.C., Dee, S., Diel, D.G., Stoian, A.M.M., Constance, L.A., Olcha, M., Petrovan, V., Patterson, G., Cino-Ozuna, A.G., Rowland, R.R.R. (2020). Mitigating the risk of African swine fever virus in feed with anti-viral chemical additives. *Transboundary and Emerging Diseases*, 68, 2, 477-486
- Ozawa, Y. and Bahrami, S., 1968. Effects of freezing on African horse-sickness virus. *Archiv für die gesamte Virusforschung*, 25(2), pp.201-210.
- Panina, G.F., Civardi, A., Cordioli, P., Massirio, I., Scatozza, F., Baldini, P., Palmia, F. (1992). Survival of hog cholera virus (HCV) in sausage meat products (Italian salami). *International Journal of Food Microbiology*, 17(1), 19
- Parker, J. (1971). Presence and inactivation of foot-and-mouth disease virus in animal faeces. *The Veterinary record*, 88(25), 659
- Petrini, S., Feliziani, F., Casciari, C., Giammarioli, M., Torresi, C., De Mia, G.M. (2019). Survival of African swine fever virus (ASFV) in various traditional Italian dry-cured meat products. *Preventive Veterinary Medicine*, 162, 126

- Plowright, W., Parker, J. (1967). The stability of African swine fever virus with particular reference to heat and pH inactivation. *Archiv für die gesamte Virusforschung*, 21(3-4), 383
- Schmitz A, Pertusa M, Le Bouquin S, Rousset N, Ogor K, LeBras M-O, Martenot C, Daniel P, Belen Cepeda Hontecillas A, Scoizec A, Morin H, Massin P, Grasland B, Niqueux E, Eterradossi N. 2020. Natural and experimental persistence of highly pathogenic H5 influenza viruses in slurry of domestic ducks, with or without lime treatment. *Appl Environ Microbiol* 86:e02288-20.
- Scott, G.R. (1959). Heat inactivation of rinderpest-infected bovine tissues. *Nature*, 184(4703), 1948
- Sindryakova IP, Yu.P. Morgunov, A.Yu. Chichikin, I.Kh. Gazaev, D.A. Kudryashov, S.Zh. Tsybanov (2016). The influence of temperature on the Russian isolate of African swine fever virus in pork products and feed with extrapolation to natural conditions. *Sel'skokhozyaistvennaya Biologiya*, 51(4), 467
- Sonder, E., Ackermann, M., McCullough, K.C., Kihm, U. (1990). Inactivation of foot and mouth disease virus in skimmed milk with propionic acid, citric acid and hydrogen peroxide. *Revue scientifique et technique (International Office of Epizootics)*, 9(4), 1139
- Stenfeldt, C., Bertram, M. R., Meek, H. C., Hartwig, E. J., Smoliga, G. R., Niederwerder, M. C., Diel, D. G., Dee, S. A., Arzt, J. (2022). The risk and mitigation of foot-and-mouth disease virus infection of pigs through consumption of contaminated feed. *Transboundary and Emerging Diseases*, 69(1), 72-87
- Stenfeldt, C., Bertram, M.R., Smoliga, G.R., Hartwig, E.J., Delgado, A.H., Arzt, J. (2020). Duration of Contagion of Foot-And-Mouth Disease Virus in Infected Live Pigs and Carcasses. *Frontiers in Veterinary Science*, 7, 334
- Stephens, C.B., Spackman, E. (2017). Thermal Inactivation of avian influenza virus in poultry litter as a method to decontaminate poultry houses. *Preventive Veterinary Medicine*, 145, 73
- Stoian, A.M.M., Zimmerman, J., Ji, J., Hefley, T.J., Dee, S., Diel, D.G., Rowland, R.R.R., Niederwerder, M.C. (2019). Half-life of African swine fever virus in shipped feed. *Emerging Infectious Diseases*, 25(12), 2261
- Swayne, D.E., Beck, J.R. (2004). Heat inactivation of avian influenza and Newcastle disease viruses in egg products. *Avian Pathology*, 33(5), 512
- Tanneberger, F., Wahed, A.A.E., Fischer, M., Blome, S., Truyen, U. (2021). The efficacy of disinfection on modified Vaccinia Ankara and African swine fever virus in various forest soil types. *Viruses*, 13(11), 2137
- Tran, H. T. T., Truong, A. D., Ly, D. V., Van Hoang, T., Chu, N. T., Nguyen, H. T., Dang, A. T. K., De Vos, M., Lannoo, K., Bruggeman, G., Dang, H. V. (2021). The potential anti-african swine fever virus effects of medium chain fatty acids on in vitro feed model: An evaluation study using epidemic ASFV strain circulating in Vietnam. *Open Veterinary Journal*, 11(3), 346-355
- Turner, C., Williams, S.M. (1999). Laboratory-scale inactivation of African swine fever virus and swine vesicular disease virus in pig slurry. *Journal of Applied Microbiology*, 87(1), 148

- Turner C, S. M. Williams, P. J. Wilkinson (1999). Recovery and assay of African swine fever and swine vesicular disease viruses from pig slurry. *Journal of Applied Microbiology*, 87, 447-453
- Wafula, J.S., Mirangi, P.K., Ileri, R.G., Mbugua, N. (1986). Development and stability of rinderpest virus antigens in cattle tears and lymph nodes. *Tropical Animal Health and Production*, 18(1), 26
- Weesendorp, E., Stegeman, A., Loeffen, W.L.A. (2008). Survival of classical swine fever virus at various temperatures in faeces and urine derived from experimentally infected pigs. *Veterinary Microbiology*, 132(3-4), 249
- Wijnker, J.J., Haas, B., Berends, B.R. (2007). Removal of foot-and-mouth disease virus infectivity in salted natural casings by minor adaptation of standardized industrial procedures. *International Journal of Food Microbiology*, 115(2), 214
- Wijnker, J.J., Haas, B., Berends, B.R. (2012). Inactivation of foot-and-mouth disease virus in various bovine tissues used for the production of natural sausage casings. *International Journal of Food Microbiology*, 153(1-2), 237
- Wood, J.P., Choi, Y.W., Chappie, D.J., Rogers, J.V., Kaye, J.Z. (2010). Environmental persistence of a highly pathogenic Avian Influenza (H5N1) virus. *Environmental Science and Technology*, 44(19), 7515
- Yamamoto, Y., Nakamura, K., Mase, M. (2017). Survival of highly pathogenic avian influenza H5N1 virus in tissues derived from experimentally infected chickens. *Applied and Environmental Microbiology*, 83(16), #Pages#
- Yamamoto, Y., Nakamura, K., Yamada, M., Mase, M. (2010). Persistence of avian influenza virus (H5N1) in feathers detached from bodies of infected domestic ducks. *Applied and Environmental Microbiology*, 76(16), 5496
- Zani, L., Masiulis, M., Bušauskas, P., Dietze, K., Pridotkas, G., Globig, A., Blome, S., Mettenleiter, T., Depner, K., Karveliėne, B. (2020). African swine fever virus survival in buried wild boar carcasses. *Transboundary and Emerging Diseases*, 67(5), 2086
- Zhai, H., Ji, C., Walsh, M. C., Bergstrom, J., Potot, S., Wang, H. (2021). The addition of nature identical flavorings accelerated the virucidal effect of pure benzoic acid against African swine fever viral contamination of complete feed. *Animals*, 11(4), 1124

## Appendix A – Extensive literature search protocol

### Review questions and eligibility criteria

#### Experimental infection studies

This SLR aims to gather all scientific evidence available regarding incubation period, infectious period, characterisation of clinical signs, and mortality and morbidity rates for the diseases in scope.

#### Review questions for experimental infection studies

What is the effect of an exposure in susceptible hosts - being experimentally infected with an agent - on these specific outcomes relating to the pathogenesis of the disease:

- What is the minimum and maximum time post inoculation to observe clinical signs?
- What is the minimum and maximum minimum infectious period in days?
- What is the minimum and maximum mortality rate?
- What is the minimum and maximum morbidity rate?
- What are the main clinical signs?

#### Study eligibility criteria for experimental infection studies

| Element             | Criteria                                                                                                                                                                                                                                                                                                                                                    | Level of screening              |
|---------------------|-------------------------------------------------------------------------------------------------------------------------------------------------------------------------------------------------------------------------------------------------------------------------------------------------------------------------------------------------------------|---------------------------------|
| Publication type    | Primary research publications                                                                                                                                                                                                                                                                                                                               | Title and abstract              |
| Language            | English                                                                                                                                                                                                                                                                                                                                                     | Title and abstract<br>Full-text |
| Study type          | Experimental infections                                                                                                                                                                                                                                                                                                                                     | Title and abstract              |
| Study design        | Experimental study design<br>Susceptible hosts must be experimentally exposed to the pathogen, either by inoculation, or direct or indirect contact transmission<br>Only a single exposure with an 'outbreak strain' or 'wild type strain' of the agent (AHL-A disease agent), in not-immunised or not-vaccinated or not-treated hosts, will be considered. | Title and abstract<br>Full-text |
| Population          | The susceptible host species                                                                                                                                                                                                                                                                                                                                | Title and abstract<br>Full text |
| Exposure            | Exposure of susceptible species with one of the AHL-A disease agents.<br>Agent infection should be confirmed by an established test                                                                                                                                                                                                                         | Title and abstract<br>Full-text |
| Outcome of interest | The article is excluded if there is no description of one of the outcomes of interest, i.e., time of detection of the                                                                                                                                                                                                                                       | Full-text                       |

|                 |                                                                                    |                    |
|-----------------|------------------------------------------------------------------------------------|--------------------|
|                 | pathogen after exposure, number of positive or dead animals, or the clinical signs |                    |
| Publishing date | 1990-2021                                                                          | Title and abstract |

### Pathogen survival studies

Aims at collecting data relating to the survival time of the disease agents in scope. Information should concern the persistence of the pathogen in different matrices.

### Review questions for agent survival studies

What is the minimum and maximum number of days post inoculation to detect active pathogen in different relevant matrices?

### Study eligibility criteria for agent survival studies

| Element             | Criteria                                                                                                                                                                                    | Level of screening              |
|---------------------|---------------------------------------------------------------------------------------------------------------------------------------------------------------------------------------------|---------------------------------|
| Publication type    | Primary research publications                                                                                                                                                               | Title and abstract              |
| Language            | English                                                                                                                                                                                     | Title and abstract<br>Full-text |
| Study type          | Pathogen survival experiments                                                                                                                                                               | Title and abstract              |
| Study design        | The study should provide details on the strain/isolate of the pathogen, the dose (in case of experimentally infected animals), and the temperature at which the matrix is stored            | Title and abstract<br>Full-text |
| Exposure            | Matrices of susceptible species exposed with one of the AHL-A disease agents in scope. Alternatively, matrices can be experimentally contaminated (spiked) with one of the agents in scope. | Title and abstract<br>Full-text |
| Outcome of interest | The article is excluded if there is no description of one of the outcomes of interest, i.e., pathogen survival time                                                                         | Full-text                       |
| Publishing date     | 1990-2021                                                                                                                                                                                   | Title and abstract              |

### Information sources

Scopus will be used as the primary platform for literature searches.

### Search strategy

#### Search strategies for experimental infection studies

The search strings for experimental infections are always a combination of 4 elements:

- 1) **String I: agent/disease description.** Name of the pathogen and diseases, with alternative names when relevant
- 2) **String II: host description.**
- 3) **String III: selection of experimental studies** (*Experiment\* OR Inoculat\**)
- 4) **Publication years selection**



These elements are joined with “AND” statements. As an example, the search string below was constructed to retrieve experimental infection studies involving sheep pox, goat pox, peste des petits ruminants and classical swine fever:

**TITLE-ABS-KEY (**  
*("Sheep pox" OR "goat pox" OR "peste des petits ruminants" OR "Classical swine fever")*  
**AND**  
*(Goat OR Capra OR caprine OR Sheep OR Ovis or Ovine OR Camel or Camelid OR Dromedary OR Alpaca OR Vicugna OR Llama OR Lama OR Vicuna OR Vicuña OR Deer OR Cervidae OR Pig OR Hog OR Suis OR Suidae)*  
**AND**  
**(Experiment\* OR Inoculat\*)**  
**) AND (PUBYEAR AFT 1989)**

### Search strategies for pathogen survival studies

The search strings for pathogen survival are always a combination of 3 elements:

- 1) String I: agent/disease description. Name of the pathogen and diseases, with alternative names when relevant
- 2) String II: selection of survival experiments (*Surviv\* OR Persist\* OR stability OR inactivat\* OR disinfect\**). The abbreviation *Surviv\** is to include terms like Survival study, Survival experiment, Survival duration, Survival period, etc. The abbreviation *Persist\** is to include terms like Persistence, Persistent, etc.
- 3) Publication years selection

These elements are joined with “AND” statements. See example in the section describing the search strategy for experimental infections.

The search is not restricted using any species keywords, nor specific types of matrices in which the pathogens were evaluated. Instead, we will use a string to search specifically for survival experiments, as detailed above.

### Selection procedure

The level 1 selection process (title and abstract review) will involve the screening of title and abstract using a screening check list developed according to the eligibility criteria defined in the relevant section above. The checklists already setup in Distiller for previous VBD reviews will be reused and adapted as needed to extend the scope to the AHL-A diseases.

If the information contained in the title or abstract is not relevant for the research objectives (any of the eligibility criteria are not met), the article will not be selected for full text assessment. The first level of screening will be performed independently and blindly by two researchers (i.e., two reviewers per study). Publications judged to be relevant by at least one reviewer will be automatically selected for further screening, while only publications rejected by both reviewers will be excluded. References without abstract will be carried over to level 2 screening, unless the title is explicit enough to make clear the lack of compliance to one or more eligibility criteria.

Level 2 screening will involve the screening of full text articles identified in level 1, one reviewer per study, based on reading the full text. Both level 1 and level 2 screenings will involve an initial phase of harmonisation and training regarding the assessment of study eligibility criteria, across all screeners of each objective.

Attempts will be made to obtain electronic versions of the full papers for all references that fulfil the eligibility and relevance criteria (i.e., those passing Level 1 screening). The CoVetLab’s

joint access to bibliographic resources is extensive but it is not possible, at the outset, to have a full overview of what journals eligible papers have been published in. Furthermore, the extent to which older publications are available in electronic format differs between publishers. In line with what was offered we will not account for requisition of publications that are not accessible through our existing channels, and/or publications that implies an extra cost for acquisition.

### **Documenting the selection**

The study selection process will be fully documented in Distiller, allowing tracking and reporting of:

- Number of records identified through each electronic database or other source
- Total number of unique records (title/abstracts) identified through electronic search
- Number of records excluded after level 1 screening
- Records (full text) potentially eligible
- Number of records excluded after level 2 screening (by reason for exclusion)
- Final number of studies included in the review

### **Methods for data collection**

---

Data collection will be performed using forms set up in Distiller® during previous SLRs. The structure of data collection has been extensively detailed at the end of the DACRAH3 project (RC\_EFSA\_ALPHA\_2018\_01). These forms ensure that data validity checks are performed during data collection, in particular compliance to the data types agreed.

One reviewer per study will individually extract data from studies that have passed screening for relevance, but a quality assurance process will be applied, as detailed below.

Authors of primary studies will not be contacted to provide missing or additional data.

### **Analysis and reporting**

---

#### **Evidence from experimental infections identified by the ELS**

The extracted evidence will be displayed in a table showing all matrices in which viable disease agent was identified by virus isolation, inoculation experiment or culture. The results will be pooled across different strains or subtypes, as control measures do not differentiate between these either.

#### **Evidence from survival studies identified by the ELS**

The findings from survival studies will be presented in a survival plot indicating the maximum number of days the virus was detected by virus isolation in different matrices under different conditions (temperature). When sufficient evidence is identified by the ELS for a minimum of 4 data points per animal matrix, this evidence will be subjected to meta-analysis. In such cases, Kaplan-Meier curves will be fit to the data, in order to estimate confidence intervals (CI) and interquartile ranges (IQ) for the duration of the pathogen survival, explicitly taking into account the data censoring issue (lack of information about true maximum when experiments ended while the agent was still detectable).
